# Supplementary material for: Systems Pharmacogenomics Finds RUNX1 Is an Aspirin-Responsive Transcription Factor Linked to Cardiovascular Disease and Colon Cancer
Source: PubMed Central journal article supplement — eBioMedicine. 2016 Aug 14;11:157–64. doi: 10.1016/j.ebiom.2016.08.021 (PMC5049978; doi:10.1016/j.ebiom.2016.08.021), 2016-08-14
Supplement: mmc1.pdf [file mmc1.pdf]

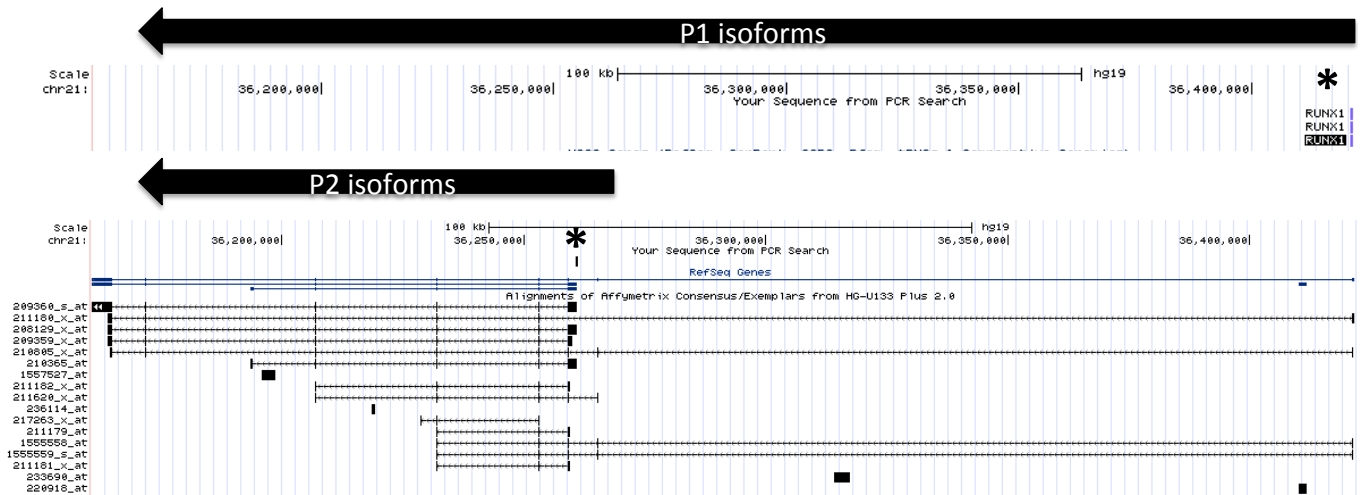

**Figure S1** *RUNX1* gene with proximal (P1) and distal (P2) promoters, major isoforms, Affymetrix U133 plus 2.0 probe sets, and PCR primers (\*) used to quantify P1 and P2 expression.

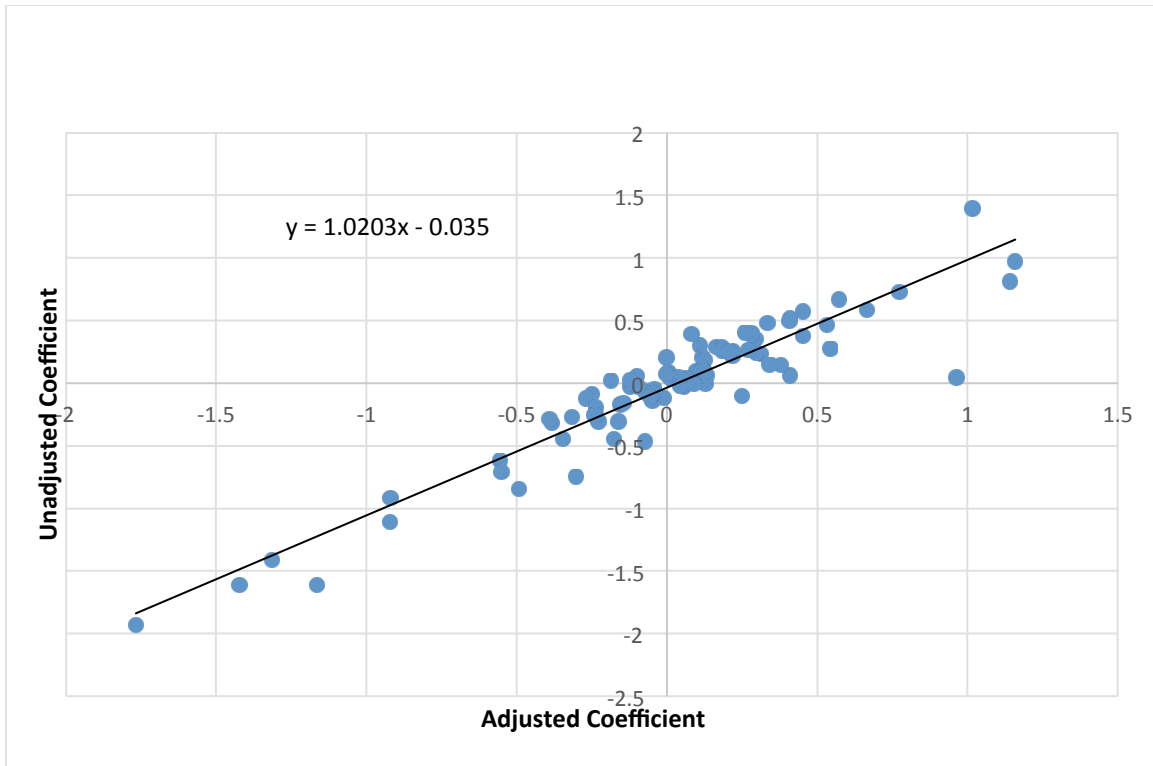

**Figure S2** Comparison of coefficients for association of gene expression with cancer free survival in Jorissen et al dataset(Jorissen et al., 2009a) with (x-axis) vs. without (y-axis)adjustment for age, gender, adjuvant chemo- or radiation therapy. Each point represents a probe set mapping to either RUNX1 or an Aspirin Response Signature gene. The fitted line is the best linear model describing the points. A slope of 1 and intercept of 0 indicate that the unadjusted and adjusted coefficients are similar for most genes.

Supplemental Table 1 – Summary of *RUNXI* microarray probe set types and correlation with *RUNXI* P1 and P2 expression by PCR<sup>1</sup>

| Probe Set    | Affymetrix probe set type <sup>2</sup> | <i>RUNXI</i> P2 |         | <i>RUNXI</i> P1 |         |
|--------------|----------------------------------------|-----------------|---------|-----------------|---------|
|              |                                        | Effect          | P-value | Effect          | P-value |
| 233690_at    | Unique                                 | 0.17            | 0.11    | 0.51            | 0.00    |
| 220918_at    | Unique                                 | 0.03            | 0.48    | 0.28            | 0.00    |
| 209360_s_at  | Identical                              | 0.14            | 0.00    | 0.06            | 0.05    |
| 211620_x_at  | Mixed                                  | 0.00            | 1.00    | -0.17           | 0.10    |
| 209359_x_at  | Mixed                                  | 0.06            | 0.47    | -0.15           | 0.20    |
| 211180_x_at  | Mixed                                  | 0.12            | 0.32    | -0.15           | 0.35    |
| 208129_x_at  | Mixed                                  | 0.06            | 1.00    | -0.09           | 0.62    |
| 1557527_at   | Unique                                 | 0.18            | 0.01    | 0.06            | 1.00    |
| 217263_x_at  | Mixed                                  | 0.12            | 0.07    | 0.00            | 1.00    |
| 210365_at    | Unique                                 | 0.20            | 0.07    | -0.02           | 1.00    |
| 211181_x_at  | Mixed                                  | 0.14            | 0.08    | -0.07           | 1.00    |
| 211182_x_at  | Mixed                                  | 0.10            | 0.29    | -0.07           | 1.00    |
| 236114_at    | Unique                                 | 0.09            | 0.54    | 0.01            | 1.00    |
| 210805_x_at  | Mixed                                  | 0.00            | 1.00    | -0.10           | 1.00    |
| 1555558_at   | Unique                                 | 0.02            | 1.00    | 0.00            | 1.00    |
| 211179_at    | Unique                                 | 0.04            | 1.00    | 0.01            | 1.00    |
| 1555559_s_at | Identical                              | -0.01           | 1.00    | -0.03           | 1.00    |

<sup>1</sup> Shaded probe sets represent those that meet two criteria: 1) map uniquely to a single sequence and 2) are significantly ( $p < 0.1$ ) associated with either *RUNXI* P1 or P2 expression by PCR.  
<sup>2</sup> Unique probe sets contain probes that do not cross hybridize to other sequences; Identical probe sets contains probes that all cross-hybridize to sequences in different genes; Mixed probe sets contain at least one probe that cross-hybridizes to more than one sequence.

## Additional Datasets

Gene expression data for two publicly available colon cancer datasets (Jorissen et al., 2009b, Smith et al., 2010) were downloaded (see Methods) and examined for differences by stage for in Aspirin Response Signature (Voora et al., 2013) probe set within each dataset (Smith and Jorissen ANOVA sheets). Using meta-analysis we combined both datasets and performed pairwise tests between stage B-D vs. stage A for each ARS probe set (Meta BvA, CvA, and DvA sheets).

Gene expression data for two publicly available colon cancer datasets were downloaded (see Methods) and examined for in colon free survival for Aspirin Response Signature (Voora et al., 2013) probe sets within each dataset (Smith and Jorissen Survival sheets sheets). Using meta-analysis we combined both datasets (Meta Survival sheet).

## Supplement References

- JORISSEN, R. N., GIBBS, P., CHRISTIE, M., PRAKASH, S., LIPTON, L., DESAI, J., KERR, D., AALTONEN, L. A., ARANGO, D., KRUIHOFFER, M., ORNTOFT, T. F., ANDERSEN, C. L., GRUIDL, M., KAMATH, V. P., ESCHRICH, S., YEATMAN, T. J. & SIEBER, O. M. 2009a. Metastasis-Associated Gene Expression Changes Predict Poor Outcomes in Patients with Dukes Stage B and C Colorectal Cancer. *Clinical cancer research : an official journal of the American Association for Cancer Research*, 15, 7642-7651.
- JORISSEN, R. N., GIBBS, P., CHRISTIE, M., PRAKASH, S., LIPTON, L., DESAI, J., KERR, D., AALTONEN, L. A., ARANGO, D., KRUIHOFFER, M., ORNTOFT, T. F., ANDERSEN, C. L., GRUIDL, M., KAMATH, V. P., ESCHRICH, S., YEATMAN, T. J. & SIEBER, O. M. 2009b. Metastasis-Associated Gene Expression Changes Predict Poor Outcomes in Patients with Dukes Stage B and C Colorectal Cancer. *Clin Cancer Res*, 15, 7642-7651.
- SMITH, J. J., DEANE, N. G., WU, F., MERCHANT, N. B., ZHANG, B., JIANG, A., LU, P., JOHNSON, J. C., SCHMIDT, C., BAILEY, C. E., ESCHRICH, S., KIS, C., LEVY, S., WASHINGTON, M. K., HESLIN, M. J., COFFEY, R. J., YEATMAN, T. J., SHYR, Y. & BEAUCHAMP, R. D. 2010. Experimentally derived metastasis gene expression profile predicts recurrence and death in patients with colon cancer. *Gastroenterology*, 138, 958-68.
- VOORA, D., CYR, D., LUCAS, J., CHI, J. T., DUNGAN, J., MCCAFFREY, T. A., KATZ, R., NEWBY, L. K., KRAUS, W. E., BECKER, R. C., ORTEL, T. L. & GINSBURG, G. S. 2013. Aspirin Exposure Reveals Novel Genes Associated with Platelet Function and Cardiovascular Events. *J Am Coll Cardiol*.

## Smith ANOVA

| probe set    | GeneName  | key.stage2 | key.stage3 | key.stage4 | AveExpr | P.Value |
|--------------|-----------|------------|------------|------------|---------|---------|
| 226152_at    | TTC7B     | 0.2923     | 0.4904     | 0.3385     | 7.1284  | 0.0015  |
| 201108_s_at  | THBS1     | 0.3325     | 0.6837     | 0.353      | 9.804   | 0.0023  |
| 200665_s_at  | SPARC     | 0.328      | 0.5019     | 0.2945     | 12.253  | 0.0029  |
| 212667_at    | SPARC     | 0.3153     | 0.634      | 0.3808     | 10.877  | 0.0033  |
| 209651_at    | TGFB1I1   | 0.2254     | 0.5343     | 0.3224     | 9.2159  | 0.0045  |
| 201058_s_at  | MYL9      | 0.5333     | 0.7625     | 0.5152     | 9.8285  | 0.0062  |
| 1552773_at   | CLEC4D    | -0.018     | -0.0485    | -0.111     | 6.2424  | 0.008   |
| 212077_at    | CALD1     | 0.1973     | 0.4362     | 0.3294     | 11.8559 | 0.0081  |
| 207414_s_at  | PCSK6     | -0.4293    | -0.4399    | -0.388     | 8.3864  | 0.0085  |
| 207156_at    | HIST1H2AG | -0.2705    | -0.0356    | 0.0807     | 5.4799  | 0.0115  |
| 204115_at    | GNG11     | 0.1317     | 0.4188     | 0.1985     | 9.105   | 0.0128  |
| 212651_at    | RHOBTB1   | 0.2225     | 0.3367     | 0.4575     | 8.3694  | 0.0161  |
| 216956_s_at  | ITGA2B    | -0.037     | -0.0867    | -0.1244    | 6.1998  | 0.0182  |
| 212813_at    | JAM3      | 0.1495     | 0.3496     | 0.2439     | 8.8929  | 0.0209  |
| 208782_at    | FSTL1     | 0.1227     | 0.3798     | 0.2061     | 10.7708 | 0.023   |
| 203817_at    | GUCY1B3   | 0.2275     | 0.3665     | 0.2098     | 8.8591  | 0.0363  |
| 207808_s_at  | PROS1     | 0.3209     | 0.5156     | 0.3246     | 9.0799  | 0.0381  |
| 224823_at    | MYLK      | 0.3067     | 0.5018     | 0.478      | 10.8513 | 0.0416  |
| 201906_s_at  | CTDSPL    | 0.0039     | 0.1421     | -0.051     | 9.6744  | 0.0501  |
| 203680_at    | PRKAR2B   | -0.282     | -0.2564    | -0.6381    | 7.769   | 0.0552  |
| 227189_at    | CPNE5     | -0.1903    | -0.168     | -0.1652    | 7.0632  | 0.0631  |
| 227180_at    | ELOVL7    | 0.3198     | -0.0855    | 0.1455     | 8.8964  | 0.0734  |
| 206272_at    | RAB4A     | 0.0904     | 0.1882     | 0.2676     | 8.8557  | 0.0768  |
| 225974_at    | TMEM64    | 0.3555     | 0.5397     | 0.3158     | 9.1598  | 0.0785  |
| 57588_at     | SLC24A3   | 0.1541     | 0.3498     | 0.2766     | 8.2488  | 0.0885  |
| 1555659_a_at | TREML1    | -0.0068    | -0.085     | -0.0087    | 7.0007  | 0.094   |
| 219090_at    | SLC24A3   | 0.1664     | 0.3596     | 0.2526     | 8.3653  | 0.0982  |
| 206655_s_at  | GP1BB     | -0.0125    | -0.0267    | -0.1395    | 7.0206  | 0.1118  |
| 37966_at     | PARVB     | 0.3274     | 0.3677     | 0.1955     | 7.6395  | 0.1128  |
| 221556_at    | CDC14B    | -0.063     | 0.0192     | 0.1599     | 8.4855  | 0.1258  |
| 1553842_at   | BEND2     | 0.0801     | 0.0985     | 0.0385     | 4.9597  | 0.132   |
| 206110_at    | HIST1H3H  | -0.2473    | -0.2253    | -0.0944    | 6.8185  | 0.1332  |
| 212573_at    | ENDOD1    | -0.0356    | 0.1342     | -0.0226    | 9.027   | 0.1795  |
| 1560262_at   | LRR32     | -0.0183    | -0.0724    | -0.0643    | 5.3142  | 0.1815  |
| 225354_s_at  | SH3BGRL2  | -0.1289    | -0.0845    | 0.0623     | 10.1452 | 0.1867  |
| 206494_s_at  | ITGA2B    | -0.0435    | -0.059     | -0.0538    | 4.6583  | 0.1975  |
| 230690_at    | TUBB1     | 0.016      | -0.0398    | 0.0013     | 5.8163  | 0.2301  |
| 214974_x_at  | CXCL5     | 0.6265     | 0.9969     | 0.7996     | 8.219   | 0.2343  |
| 203414_at    | MMD       | -0.0038    | 0.132      | 0.0764     | 9.7883  | 0.2633  |
| 206493_at    | ITGA2B    | -0.0032    | -0.0636    | -0.1066    | 7.5222  | 0.2786  |
| 206049_at    | SELP      | 0.1399     | 0.0698     | 0.0527     | 7.6833  | 0.2954  |

## Smith ANOVA

| probe set   | GeneName  | key.stage2 | key.stage3 | key.stage4 | AveExpr | P.Value |
|-------------|-----------|------------|------------|------------|---------|---------|
| 207815_at   | PF4V1     | 0.0287     | 0.0595     | -0.0289    | 4.0104  | 0.3048  |
| 226188_at   | LGALS1    | -0.079     | -0.0367    | 0.0932     | 8.9842  | 0.3104  |
| 204628_s_at | ITGB3     | 0.0804     | 0.0535     | 0.073      | 7.4427  | 0.3313  |
| 228708_at   | RAB27B    | 0.1182     | -0.0354    | -0.2794    | 9.0769  | 0.3514  |
| 208792_s_at | CLU       | 0.1836     | 0.3118     | 0.1689     | 8.5708  | 0.3528  |
| 222717_at   | SDPR      | 0.1019     | 0.2236     | 0.2369     | 6.7815  | 0.3742  |
| 210387_at   | HIST1H2BG | -0.3308    | -0.1725    | -0.1614    | 6.6259  | 0.3744  |
| 208601_s_at | TUBB1     | 0.0115     | -0.0248    | -0.0155    | 6.4864  | 0.39    |
| 205442_at   | MFAP3L    | -0.3517    | -0.1781    | -0.2555    | 6.8246  | 0.3902  |
| 212148_at   | PBX1      | -0.0403    | 0.1072     | 0.212      | 8.6328  | 0.392   |
| 220496_at   | CLEC1B    | -0.0045    | -0.0418    | -0.0312    | 7.4321  | 0.4158  |
| 207206_s_at | ALOX12    | 0.0022     | -0.0398    | -0.0119    | 6.8405  | 0.429   |
| 211026_s_at | MGLL      | -0.0555    | 0.0689     | 0.1039     | 9.6804  | 0.4404  |
| 208791_at   | CLU       | 0.1586     | 0.3047     | 0.1904     | 8.5151  | 0.4425  |
| 215779_s_at | HIST1H2BG | -0.1825    | -0.1588    | -0.0928    | 6.2462  | 0.4562  |
| 227451_s_at | C6ORF79   | 0.0645     | 0.0732     | 0.1737     | 8.8176  | 0.6051  |
| 203819_s_at | IGF2BP3   | -0.067     | 0.2506     | 0.0809     | 6.3987  | 0.6466  |
| 212151_at   | PBX1      | 0.0166     | 0.0765     | 0.1318     | 8.8926  | 0.6484  |
| 241133_at   | PRSS1     | -0.0293    | -0.0443    | -0.0384    | 5.2852  | 0.649   |
| 210986_s_at | TPM1      | 0.0733     | 0.0193     | 0.0946     | 12.1825 | 0.6579  |
| 227088_at   | PDE5A     | -0.0963    | 0.0685     | -0.0401    | 8.1783  | 0.6617  |
| 230645_at   | FRMD3     | -0.0724    | -0.0493    | -0.1858    | 6.8784  | 0.6966  |
| 230942_at   | CMTM5     | -0.007     | -0.0284    | 0.0122     | 7.282   | 0.7917  |
| 207550_at   | MPL       | 0.0086     | 0.0226     | 0.0364     | 5.014   | 0.8011  |
| 206167_s_at | ARHGAP6   | 0.106      | 0.0787     | -0.0643    | 7.0807  | 0.8495  |
| 214146_s_at | PPBP      | 0.3439     | 0.404      | 0.2773     | 7.3663  | 0.8594  |
| 201059_at   | CTTN      | 0.0324     | 0.0627     | 0.035      | 10.0915 | 0.879   |
| 225166_at   | ARHGAP18  | -0.0786    | -0.0453    | -0.0853    | 6.8501  | 0.9219  |
| 235331_x_at | PCGF5     | 0.1088     | 0.0729     | 0.0383     | 7.0513  | 0.9229  |
| 229778_at   | C12ORF39  | 0.0047     | 0.0062     | 0.0168     | 4.0643  | 0.9462  |
| 206390_x_at | PF4       | 0.001      | -0.021     | 0.0139     | 7.8762  | 0.9885  |

Jorissen ANOVA

| probe set    | GeneName | key.stage2 | key.stage3 | key.stage4 | AveExpr | P.Value |
|--------------|----------|------------|------------|------------|---------|---------|
| 226152_at    | TTC7B    | 0.3014     | 0.4639     | 0.3898     | 6.9515  | 0.0011  |
| 201058_s_at  | MYL9     | 0.7127     | 0.7196     | 0.6899     | 9.2586  | 0.0013  |
| 227189_at    | CPNE5    | -0.2217    | -0.1364    | -0.2455    | 6.4551  | 0.0016  |
| 212667_at    | SPARC    | 0.397      | 0.6172     | 0.4726     | 10.3232 | 0.0021  |
| 200665_s_at  | SPARC    | 0.375      | 0.5161     | 0.3675     | 11.8067 | 0.0029  |
| 212077_at    | CALD1    | 0.3262     | 0.4586     | 0.3739     | 11.5609 | 0.0033  |
| 201108_s_at  | THBS1    | 0.3029     | 0.503      | 0.4438     | 9.2409  | 0.0058  |
| 207414_s_at  | PCSK6    | -0.3267    | -0.344     | -0.3072    | 7.9278  | 0.0078  |
| 203680_at    | PRKAR2B  | -0.2341    | -0.348     | -0.6581    | 7.5505  | 0.0092  |
| 209651_at    | TGFB1I1  | 0.3577     | 0.4776     | 0.4332     | 8.6405  | 0.0098  |
| 220496_at    | CLEC1B   | 0.0179     | -0.0533    | -0.0417    | 6.8405  | 0.0131  |
| 224823_at    | MYLK     | 0.4785     | 0.5409     | 0.5361     | 10.3868 | 0.0169  |
| 212651_at    | RHOBTB1  | 0.0973     | 0.2039     | 0.3708     | 7.5845  | 0.0226  |
| 219090_at    | SLC24A3  | 0.2876     | 0.3322     | 0.4151     | 7.7354  | 0.0287  |
| 212813_at    | JAM3     | 0.2007     | 0.2737     | 0.3131     | 8.6541  | 0.0307  |
| 203817_at    | GUCY1B3  | 0.3059     | 0.3557     | 0.3262     | 8.3873  | 0.0345  |
| 204115_at    | GNG11    | 0.2235     | 0.3861     | 0.2623     | 8.6923  | 0.0373  |
| 57588_at     | SLC24A3  | 0.2025     | 0.2914     | 0.3776     | 7.6493  | 0.0386  |
| 228708_at    | RAB27B   | 0.1345     | 0.0151     | -0.3644    | 8.682   | 0.0477  |
| 1560262_at   | LRRC32   | -0.0646    | -0.0912    | -0.0623    | 4.8297  | 0.0572  |
| 208782_at    | FSTL1    | 0.1624     | 0.3311     | 0.2514     | 10.3262 | 0.0603  |
| 212573_at    | ENDOD1   | 0.0416     | 0.2132     | 0.0719     | 8.7469  | 0.0636  |
| 204628_s_at  | ITGB3    | 0.1026     | 0.0268     | 0.0182     | 7.0451  | 0.0846  |
| 227180_at    | ELOVL7   | 0.1566     | -0.1437    | -0.1045    | 8.4709  | 0.0899  |
| 214974_x_at  | CXCL5    | 0.6081     | 0.9484     | 0.5997     | 7.9401  | 0.1015  |
| 212148_at    | PBX1     | 0.0519     | 0.1092     | 0.3272     | 8.2904  | 0.1074  |
| 207815_at    | PF4V1    | 0.0353     | 0.0515     | -0.0308    | 3.6583  | 0.1136  |
| 1555659_a_at | TREML1   | -0.0391    | -0.0762    | 0.0013     | 6.6807  | 0.1244  |
| 207206_s_at  | ALOX12   | 0.0432     | 0.005      | -0.0302    | 6.301   | 0.1287  |

Jorissen ANOVA

| probe set   | GeneName  | key.stage2 | key.stage3 | key.stage4 | AveExpr | P.Value |
|-------------|-----------|------------|------------|------------|---------|---------|
| 225354_s_at | SH3BGRL2  | -0.1191    | -0.025     | 0.0638     | 9.7399  | 0.1336  |
| 1553842_at  | BEND2     | 0.017      | 0.0479     | -0.0199    | 4.64    | 0.1476  |
| 221556_at   | CDC14B    | -0.1091    | -0.0057    | 0.0875     | 8.223   | 0.1577  |
| 1552773_at  | CLEC4D    | 0.0513     | 0.0131     | -0.0155    | 5.8716  | 0.1587  |
| 203414_at   | MMD       | 0.0232     | 0.1177     | 0.13       | 9.5199  | 0.1792  |
| 222717_at   | SDPR      | 0.2511     | 0.224      | 0.3861     | 6.3826  | 0.1897  |
| 207808_s_at | PROS1     | 0.0417     | 0.2183     | 0.2472     | 8.897   | 0.2113  |
| 212151_at   | PBX1      | 0.0775     | 0.0402     | 0.2151     | 8.8109  | 0.2151  |
| 203819_s_at | IGF2BP3   | 0.3273     | 0.5313     | 0.3617     | 5.8796  | 0.2242  |
| 206049_at   | SELP      | 0.0942     | 0.0052     | -0.0065    | 7.3906  | 0.2422  |
| 235331_x_at | PCGF5     | -0.1967    | -0.1769    | -0.2866    | 6.7696  | 0.2466  |
| 206167_s_at | ARHGAP6   | 0.3597     | 0.3128     | 0.3074     | 6.672   | 0.2901  |
| 208792_s_at | CLU       | 0.2599     | 0.3394     | 0.2847     | 8.3553  | 0.3048  |
| 226188_at   | LGALS1    | -0.0857    | -0.0077    | 0.0614     | 8.7322  | 0.3089  |
| 210986_s_at | TPM1      | 0.0643     | -0.0202    | 0.0894     | 11.9018 | 0.3536  |
| 225974_at   | TMEM64    | 0.2306     | 0.2979     | 0.1912     | 8.7928  | 0.3628  |
| 225166_at   | ARHGAP18  | -0.097     | -0.1978    | -0.119     | 6.6369  | 0.3642  |
| 208791_at   | CLU       | 0.2305     | 0.3174     | 0.2878     | 8.3694  | 0.366   |
| 230690_at   | TUBB1     | 0.0193     | -0.0202    | 0.015      | 5.4767  | 0.3663  |
| 210387_at   | HIST1H2BG | 0.0561     | 0.2282     | 0.206      | 6.363   | 0.3688  |
| 241133_at   | PRSS1     | -0.0368    | -0.0625    | -0.0584    | 5.1363  | 0.3967  |
| 207156_at   | HIST1H2AG | -0.0735    | 0.0254     | 0.1151     | 5.349   | 0.4051  |
| 37966_at    | PARVB     | 0.1461     | 0.1725     | 0.0548     | 7.3797  | 0.4273  |
| 206655_s_at | GP1BB     | 0.0106     | 0.0288     | -0.0686    | 6.5017  | 0.4646  |
| 205442_at   | MFAP3L    | -0.1581    | -0.1814    | 0.0208     | 6.5332  | 0.4706  |
| 206494_s_at | ITGA2B    | -0.023     | -0.0313    | -0.0488    | 4.3658  | 0.4759  |
| 216956_s_at | ITGA2B    | -0.0307    | -0.0502    | -0.0635    | 5.7151  | 0.48    |
| 206272_at   | RAB4A     | -0.0327    | 0.0201     | 0.0801     | 8.4287  | 0.5151  |
| 230942_at   | CMTM5     | -0.0521    | -0.0609    | -0.0287    | 6.8353  | 0.5293  |



Jorissen ANOVA

| probe set   | GeneName  | key.stage2 | key.stage3 | key.stage4 | AveExpr | P.Value |
|-------------|-----------|------------|------------|------------|---------|---------|
| 207550_at   | MPL       | -0.0063    | -0.0278    | 0.0233     | 4.7068  | 0.5339  |
| 214146_s_at | PPBP      | 0.4085     | 0.5172     | 0.4298     | 6.4749  | 0.5765  |
| 208601_s_at | TUBB1     | -0.027     | -0.0364    | -0.0409    | 5.6026  | 0.6164  |
| 229778_at   | C12ORF39  | 0.0071     | -0.0182    | 0.0027     | 3.7252  | 0.6626  |
| 211026_s_at | MGLL      | 0.031      | 0.1102     | 0.0946     | 9.4465  | 0.6747  |
| 215779_s_at | HIST1H2BG | 0.0445     | 0.1159     | 0.1094     | 5.9326  | 0.6874  |
| 201906_s_at | CTDSPL    | -0.0644    | -0.0156    | -0.068     | 9.312   | 0.709   |
| 230645_at   | FRMD3     | 0.079      | 0.0603     | -0.0638    | 6.8273  | 0.7653  |
| 206390_x_at | PF4       | -0.1064    | -0.0703    | -0.0567    | 7.4299  | 0.7913  |
| 227451_s_at | C6ORF79   | -0.0321    | -0.0391    | 0.0435     | 8.4604  | 0.7986  |
| 201059_at   | CTTN      | -0.0273    | 0.0139     | -0.0399    | 9.8714  | 0.8205  |
| 206110_at   | HIST1H3H  | 0.0864     | 0.0939     | 0.0467     | 6.3834  | 0.8246  |
| 206493_at   | ITGA2B    | 0.0128     | -0.0245    | -0.0319    | 6.9668  | 0.8433  |
| 227088_at   | PDE5A     | 0.0689     | 0.0028     | 0.0498     | 7.8206  | 0.9334  |

## Meta BvA

| probe set   | GeneName  | Effect.fixed | SE.fixed | Z.fixed | Pvalue.fixed |
|-------------|-----------|--------------|----------|---------|--------------|
| 201058_s_at | MYL9      | 0.6302       | 0.1457   | 4.3263  | 0            |
| 207414_s_at | PCSK6     | -0.3652      | 0.084    | -4.3468 | 0            |
| 227189_at   | CPNE5     | -0.2078      | 0.0485   | -4.2831 | 0            |
| 200665_s_at | SPARC     | 0.351        | 0.0956   | 3.6708  | 0.0002       |
| 226152_at   | TTC7B     | 0.2972       | 0.0853   | 3.4855  | 0.0005       |
| 212667_at   | SPARC     | 0.3599       | 0.1186   | 3.0356  | 0.0024       |
| 224823_at   | MYLK      | 0.3958       | 0.1306   | 3.0295  | 0.0024       |
| 203817_at   | GUCY1B3   | 0.2668       | 0.0896   | 2.978   | 0.0029       |
| 212077_at   | CALD1     | 0.2677       | 0.0917   | 2.9182  | 0.0035       |
| 209651_at   | TGFB111   | 0.2968       | 0.1068   | 2.7783  | 0.0055       |
| 204628_s_at | ITGB3     | 0.0907       | 0.0333   | 2.7233  | 0.0065       |
| 201108_s_at | THBS1     | 0.3143       | 0.1159   | 2.7125  | 0.0067       |
| 219090_at   | SLC24A3   | 0.2353       | 0.1001   | 2.3498  | 0.0188       |
| 212813_at   | JAM3      | 0.1787       | 0.0792   | 2.2569  | 0.024        |
| 206049_at   | SELP      | 0.1132       | 0.0513   | 2.2068  | 0.0273       |
| 37966_at    | PARVB     | 0.2096       | 0.0967   | 2.1668  | 0.0302       |
| 225974_at   | TMEM64    | 0.2798       | 0.1312   | 2.1336  | 0.0329       |
| 214974_x_at | CXCL5     | 0.615        | 0.3006   | 2.046   | 0.0408       |
| 57588_at    | SLC24A3   | 0.1824       | 0.0969   | 1.8823  | 0.0598       |
| 204115_at   | GNG11     | 0.1814       | 0.0979   | 1.8528  | 0.0639       |
| 207156_at   | HIST1H2AG | -0.1658      | 0.091    | -1.8227 | 0.0684       |
| 1560262_at  | LRRC32    | -0.047       | 0.026    | -1.8049 | 0.0711       |
| 225354_s_at | SH3BGRL2  | -0.123       | 0.069    | -1.7824 | 0.0747       |
| 203680_at   | PRKAR2B   | -0.2534      | 0.1448   | -1.75   | 0.0801       |
| 205442_at   | MFAP3L    | -0.2348      | 0.1342   | -1.7498 | 0.0802       |
| 208792_s_at | CLU       | 0.2209       | 0.1268   | 1.7417  | 0.0816       |
| 227180_at   | ELOVL7    | 0.2162       | 0.1248   | 1.7326  | 0.0832       |
| 206167_s_at | ARHGAP6   | 0.2616       | 0.1516   | 1.7261  | 0.0843       |
| 206494_s_at | ITGA2B    | -0.0336      | 0.0204   | -1.6513 | 0.0987       |

## Meta BvA

| probe set    | GeneName  | Effect.fixed | SE.fixed | Z.fixed | Pvalue.fixed |
|--------------|-----------|--------------|----------|---------|--------------|
| 212651_at    | RHOBTB1   | 0.1514       | 0.0923   | 1.6397  | 0.1011       |
| 208782_at    | FSTL1     | 0.1443       | 0.0937   | 1.5391  | 0.1238       |
| 222717_at    | SDPR      | 0.1725       | 0.1131   | 1.5247  | 0.1273       |
| 208791_at    | CLU       | 0.1961       | 0.1333   | 1.4714  | 0.1412       |
| 1553842_at   | BEND2     | 0.0387       | 0.0273   | 1.4168  | 0.1565       |
| 207808_s_at  | PROS1     | 0.1569       | 0.1147   | 1.3688  | 0.1711       |
| 214146_s_at  | PPBP      | 0.384        | 0.2954   | 1.2999  | 0.1936       |
| 241133_at    | PRSS1     | -0.0327      | 0.0263   | -1.2419 | 0.2143       |
| 221556_at    | CDC14B    | -0.0888      | 0.073    | -1.2155 | 0.2242       |
| 226188_at    | LGALS1    | -0.0831      | 0.0688   | -1.2071 | 0.2274       |
| 210986_s_at  | TPM1      | 0.0681       | 0.0592   | 1.1499  | 0.2502       |
| 216956_s_at  | ITGA2B    | -0.0337      | 0.0293   | -1.1492 | 0.2505       |
| 225166_at    | ARHGAP18  | -0.0892      | 0.0866   | -1.0305 | 0.3028       |
| 207815_at    | PF4V1     | 0.0331       | 0.0327   | 1.0111  | 0.312        |
| 230942_at    | CMTM5     | -0.0316      | 0.0329   | -0.9623 | 0.3359       |
| 207206_s_at  | ALOX12    | 0.0228       | 0.0249   | 0.9189  | 0.3581       |
| 203819_s_at  | IGF2BP3   | 0.1815       | 0.2017   | 0.8996  | 0.3683       |
| 1555659_a_at | TREML1    | -0.0252      | 0.031    | -0.8131 | 0.4162       |
| 235331_x_at  | PCGF5     | -0.0851      | 0.1049   | -0.8112 | 0.4173       |
| 228708_at    | RAB27B    | 0.1284       | 0.1587   | 0.8088  | 0.4186       |
| 210387_at    | HIST1H2BG | -0.1002      | 0.1255   | -0.7986 | 0.4245       |
| 230690_at    | TUBB1     | 0.018        | 0.023    | 0.7841  | 0.433        |
| 206110_at    | HIST1H3H  | -0.0615      | 0.082    | -0.7501 | 0.4532       |
| 206390_x_at  | PF4       | -0.0595      | 0.0799   | -0.7452 | 0.4561       |
| 215779_s_at  | HIST1H2BG | -0.0588      | 0.0832   | -0.7067 | 0.4797       |
| 1552773_at   | CLEC4D    | 0.0175       | 0.025    | 0.7013  | 0.4831       |
| 212151_at    | PBX1      | 0.051        | 0.0806   | 0.6325  | 0.5271       |
| 201906_s_at  | CTDSPL    | -0.0359      | 0.0568   | -0.6315 | 0.5277       |
| 220496_at    | CLEC1B    | 0.0083       | 0.0222   | 0.3713  | 0.7104       |

## Meta BvA

| <b>probe set</b> | <b>GeneName</b> | <b>Effect.fixed</b> | <b>SE.fixed</b> | <b>Z.fixed</b> | <b>Pvalue.fixed</b> |
|------------------|-----------------|---------------------|-----------------|----------------|---------------------|
| 229778_at        | C12ORF39        | 0.006               | 0.0196          | 0.3087         | 0.7576              |
| 208601_s_at      | TUBB1           | -0.0063             | 0.021           | -0.2993        | 0.7647              |
| 203414_at        | MMD             | 0.0129              | 0.0597          | 0.2164         | 0.8287              |
| 206272_at        | RAB4A           | 0.0136              | 0.0665          | 0.2046         | 0.8379              |
| 212148_at        | PBX1            | 0.0171              | 0.1123          | 0.1522         | 0.879               |
| 212573_at        | ENDOD1          | 0.0085              | 0.0718          | 0.1188         | 0.9055              |
| 206493_at        | ITGA2B          | 0.0055              | 0.0474          | 0.1158         | 0.9078              |
| 211026_s_at      | MGLL            | -0.0052             | 0.0825          | -0.0628        | 0.9499              |
| 227451_s_at      | C6ORF79         | 0.004               | 0.0788          | 0.0514         | 0.959               |
| 230645_at        | FRMD3           | 0.0048              | 0.115           | 0.0415         | 0.9669              |
| 207550_at        | MPL             | 0.0008              | 0.0279          | 0.0301         | 0.976               |
| 206655_s_at      | GP1BB           | -0.0012             | 0.0489          | -0.0237        | 0.9811              |
| 201059_at        | CTTN            | -0.0011             | 0.0529          | -0.0206        | 0.9836              |
| 227088_at        | PDE5A           | 0.0013              | 0.1112          | 0.0121         | 0.9904              |

Meta CvA

| probe set    | GeneName | Effect.fixed | SE.fixed | Z.fixed | Pvalue.fixed |
|--------------|----------|--------------|----------|---------|--------------|
| 200665_s_at  | SPARC    | 0.5088       | 0.0959   | 5.3072  | 0            |
| 201058_s_at  | MYL9     | 0.7394       | 0.1461   | 5.0619  | 0            |
| 201108_s_at  | THBS1    | 0.5727       | 0.1162   | 4.9274  | 0            |
| 204115_at    | GNG11    | 0.4012       | 0.0982   | 4.0847  | 0            |
| 207414_s_at  | PCSK6    | -0.3802      | 0.0843   | -4.5112 | 0            |
| 209651_at    | TGFB1I1  | 0.5039       | 0.1071   | 4.704   | 0            |
| 212077_at    | CALD1    | 0.4484       | 0.092    | 4.8743  | 0            |
| 212667_at    | SPARC    | 0.6249       | 0.1189   | 5.2549  | 0            |
| 226152_at    | TTC7B    | 0.4764       | 0.0855   | 5.5717  | 0            |
| 203817_at    | GUCY1B3  | 0.3611       | 0.0898   | 4.0194  | 0.0001       |
| 212813_at    | JAM3     | 0.3066       | 0.0794   | 3.8617  | 0.0001       |
| 224823_at    | MYLK     | 0.522        | 0.131    | 3.9849  | 0.0001       |
| 208782_at    | FSTL1    | 0.3534       | 0.094    | 3.7594  | 0.0002       |
| 219090_at    | SLC24A3  | 0.3441       | 0.1004   | 3.4258  | 0.0006       |
| 57588_at     | SLC24A3  | 0.3158       | 0.0972   | 3.2498  | 0.0012       |
| 1560262_at   | LRRC32   | -0.084       | 0.0261   | -3.2157 | 0.0013       |
| 214974_x_at  | CXCL5    | 0.9665       | 0.3016   | 3.2049  | 0.0014       |
| 227189_at    | CPNE5    | -0.1505      | 0.0487   | -3.092  | 0.002        |
| 225974_at    | TMEM64   | 0.3938       | 0.1316   | 2.9932  | 0.0028       |
| 207808_s_at  | PROS1    | 0.3417       | 0.115    | 2.9714  | 0.003        |
| 212651_at    | RHOBTB1  | 0.2616       | 0.0926   | 2.8255  | 0.0047       |
| 1555659_a_at | TREML1   | -0.08        | 0.0311   | -2.5735 | 0.0101       |
| 208792_s_at  | CLU      | 0.3252       | 0.1272   | 2.5574  | 0.0105       |
| 212573_at    | ENDOD1   | 0.1792       | 0.072    | 2.4891  | 0.0128       |
| 37966_at     | PARVB    | 0.2414       | 0.0971   | 2.4862  | 0.0129       |
| 1553842_at   | BEND2    | 0.0654       | 0.0274   | 2.3865  | 0.017        |
| 208791_at    | CLU      | 0.3113       | 0.1337   | 2.3287  | 0.0199       |
| 216956_s_at  | ITGA2B   | -0.0677      | 0.0294   | -2.3018 | 0.0213       |
| 206494_s_at  | ITGA2B   | -0.0457      | 0.0204   | -2.2389 | 0.0252       |

## Meta CvA

| probe set   | GeneName | Effect.fixed | SE.fixed | Z.fixed | Pvalue.fixed |
|-------------|----------|--------------|----------|---------|--------------|
| 220496_at   | CLEC1B   | -0.0483      | 0.0223   | -2.1673 | 0.0302       |
| 203680_at   | PRKAR2B  | -0.3109      | 0.1452   | -2.1409 | 0.0323       |
| 203819_s_at | IGF2BP3  | 0.4268       | 0.2024   | 2.1086  | 0.035        |
| 203414_at   | MMD      | 0.1232       | 0.0599   | 2.0567  | 0.0397       |
| 241133_at   | PRSS1    | -0.0526      | 0.0264   | -1.9919 | 0.0464       |
| 222717_at   | SDPR     | 0.2238       | 0.1134   | 1.9738  | 0.0484       |
| 207815_at   | PF4V1    | 0.0542       | 0.0328   | 1.6502  | 0.0989       |
| 214146_s_at | PPBP     | 0.4741       | 0.2964   | 1.5994  | 0.1097       |
| 225166_at   | ARHGAP18 | -0.1329      | 0.0868   | -1.5302 | 0.126        |
| 206167_s_at | ARHGAP6  | 0.2218       | 0.152    | 1.4585  | 0.1447       |
| 208601_s_at | TUBB1    | -0.0301      | 0.0211   | -1.4294 | 0.1529       |
| 230942_at   | CMTM5    | -0.0461      | 0.0329   | -1.398  | 0.1621       |
| 205442_at   | MFAP3L   | -0.1801      | 0.1346   | -1.3378 | 0.181        |
| 206272_at   | RAB4A    | 0.0838       | 0.0667   | 1.2556  | 0.2093       |
| 204628_s_at | ITGB3    | 0.0411       | 0.0334   | 1.2307  | 0.2184       |
| 230690_at   | TUBB1    | -0.0281      | 0.023    | -1.2192 | 0.2228       |
| 211026_s_at | MGLL     | 0.0928       | 0.0828   | 1.1213  | 0.2622       |
| 227180_at   | ELOVL7   | -0.1224      | 0.1252   | -0.9774 | 0.3284       |
| 212148_at   | PBX1     | 0.1085       | 0.1126   | 0.9629  | 0.3356       |
| 206493_at   | ITGA2B   | -0.0425      | 0.0475   | -0.8948 | 0.3709       |
| 201906_s_at | CTDSPL   | 0.0506       | 0.057    | 0.8878  | 0.3746       |
| 235331_x_at | PCGF5    | -0.085       | 0.1053   | -0.808  | 0.4191       |
| 225354_s_at | SH3BGRL2 | -0.0488      | 0.0692   | -0.7048 | 0.481        |
| 207206_s_at | ALOX12   | -0.0173      | 0.0249   | -0.6957 | 0.4866       |
| 212151_at   | PBX1     | 0.0561       | 0.0808   | 0.6941  | 0.4876       |
| 1552773_at  | CLEC4D   | -0.0171      | 0.0251   | -0.6813 | 0.4957       |
| 201059_at   | CTTN     | 0.0354       | 0.0531   | 0.6681  | 0.5041       |
| 206049_at   | SELP     | 0.0323       | 0.0515   | 0.6273  | 0.5305       |
| 206390_x_at | PF4      | -0.0487      | 0.0801   | -0.6077 | 0.5434       |

Meta CvA

| <b>probe set</b> | <b>GeneName</b> | <b>Effect.fixed</b> | <b>SE.fixed</b> | <b>Z.fixed</b> | <b>Pvalue.fixed</b> |
|------------------|-----------------|---------------------|-----------------|----------------|---------------------|
| 206110_at        | HIST1H3H        | -0.0484             | 0.0822          | -0.589         | 0.5558              |
| 210387_at        | HIST1H2BG       | 0.0653              | 0.1259          | 0.5188         | 0.6039              |
| 229778_at        | C12ORF39        | -0.0071             | 0.0197          | -0.3622        | 0.7172              |
| 226188_at        | LGALS1          | -0.0192             | 0.069           | -0.2776        | 0.7813              |
| 227088_at        | PDE5A           | 0.0298              | 0.1116          | 0.2671         | 0.7894              |
| 207550_at        | MPL             | -0.0036             | 0.028           | -0.128         | 0.8981              |
| 215779_s_at      | HIST1H2BG       | -0.0098             | 0.0835          | -0.1177        | 0.9063              |
| 221556_at        | CDC14B          | 0.0053              | 0.0732          | 0.0728         | 0.9419              |
| 210986_s_at      | TPM1            | -0.0034             | 0.0594          | -0.0567        | 0.9548              |
| 230645_at        | FRMD3           | 0.0063              | 0.1153          | 0.0548         | 0.9563              |
| 227451_s_at      | C6ORF79         | 0.0032              | 0.079           | 0.0403         | 0.9679              |
| 207156_at        | HIST1H2AG       | -0.0034             | 0.0912          | -0.0372        | 0.9703              |
| 228708_at        | RAB27B          | -0.0039             | 0.1592          | -0.0245        | 0.9805              |
| 206655_s_at      | GP1BB           | 0.0004              | 0.049           | 0.0085         | 0.9932              |

Meta DvA

| probe set   | GeneName | Effect.fixed | SE.fixed | Z.fixed | Pvalue.fixed |
|-------------|----------|--------------|----------|---------|--------------|
| 203680_at   | PRKAR2B  | -0.6499      | 0.1558   | -4.1718 | 0            |
| 212651_at   | RHOBTB1  | 0.4089       | 0.0993   | 4.1185  | 0            |
| 201058_s_at | MYL9     | 0.6082       | 0.1566   | 3.8835  | 0.0001       |
| 226152_at   | TTC7B    | 0.3655       | 0.0917   | 3.9878  | 0.0001       |
| 227189_at   | CPNE5    | -0.2094      | 0.0522   | -4.0127 | 0.0001       |
| 207414_s_at | PCSK6    | -0.3381      | 0.0904   | -3.7384 | 0.0002       |
| 212077_at   | CALD1    | 0.3534       | 0.0986   | 3.5831  | 0.0003       |
| 224823_at   | MYLK     | 0.5077       | 0.1404   | 3.616   | 0.0003       |
| 212667_at   | SPARC    | 0.4303       | 0.1275   | 3.3752  | 0.0007       |
| 209651_at   | TGFB1I1  | 0.3813       | 0.1148   | 3.3208  | 0.0009       |
| 212813_at   | JAM3     | 0.2827       | 0.0851   | 3.3205  | 0.0009       |
| 201108_s_at | THBS1    | 0.4083       | 0.1247   | 3.274   | 0.0011       |
| 200665_s_at | SPARC    | 0.3298       | 0.1027   | 3.21    | 0.0013       |
| 57588_at    | SLC24A3  | 0.3349       | 0.1042   | 3.2126  | 0.0013       |
| 219090_at   | SLC24A3  | 0.3437       | 0.1077   | 3.1918  | 0.0014       |
| 216956_s_at | ITGA2B   | -0.093       | 0.0315   | -2.9512 | 0.0032       |
| 203817_at   | GUCY1B3  | 0.2673       | 0.0963   | 2.7761  | 0.0055       |
| 222717_at   | SDPR     | 0.3063       | 0.1215   | 2.522   | 0.0117       |
| 206494_s_at | ITGA2B   | -0.0514      | 0.0219   | -2.3496 | 0.0188       |
| 212148_at   | PBX1     | 0.2828       | 0.1209   | 2.34    | 0.0193       |
| 1552773_at  | CLEC4D   | -0.0628      | 0.0268   | -2.3372 | 0.0194       |
| 208782_at   | FSTL1    | 0.2304       | 0.1008   | 2.2856  | 0.0223       |
| 207808_s_at | PROS1    | 0.2797       | 0.1234   | 2.2679  | 0.0233       |
| 1560262_at  | LRRC32   | -0.0631      | 0.028    | -2.2505 | 0.0244       |
| 204115_at   | GNG11    | 0.2326       | 0.1053   | 2.2091  | 0.0272       |
| 206272_at   | RAB4A    | 0.152        | 0.0716   | 2.1229  | 0.0338       |
| 214974_x_at | CXCL5    | 0.6752       | 0.3236   | 2.0867  | 0.0369       |
| 212151_at   | PBX1     | 0.1782       | 0.0867   | 2.0558  | 0.0398       |
| 206655_s_at | GP1BB    | -0.1053      | 0.0525   | -2.0031 | 0.0452       |



Meta DvA

| probe set   | GeneName  | Effect.fixed | SE.fixed | Z.fixed | Pvalue.fixed |
|-------------|-----------|--------------|----------|---------|--------------|
| 228708_at   | RAB27B    | -0.332       | 0.1709   | -1.9429 | 0.052        |
| 225974_at   | TMEM64    | 0.2412       | 0.1411   | 1.709   | 0.0874       |
| 203414_at   | MMD       | 0.1091       | 0.0643   | 1.698   | 0.0895       |
| 208791_at   | CLU       | 0.2405       | 0.1433   | 1.6789  | 0.0932       |
| 241133_at   | PRSS1     | -0.0474      | 0.0283   | -1.6765 | 0.0936       |
| 208792_s_at | CLU       | 0.2247       | 0.1363   | 1.6489  | 0.0992       |
| 220496_at   | CLEC1B    | -0.0371      | 0.0239   | -1.5526 | 0.1205       |
| 221556_at   | CDC14B    | 0.1201       | 0.0785   | 1.5291  | 0.1262       |
| 235331_x_at | PCGF5     | -0.1656      | 0.1129   | -1.4659 | 0.1427       |
| 210986_s_at | TPM1      | 0.0916       | 0.0637   | 1.4382  | 0.1504       |
| 204628_s_at | ITGB3     | 0.0479       | 0.0358   | 1.3395  | 0.1804       |
| 206493_at   | ITGA2B    | -0.0668      | 0.0509   | -1.3106 | 0.19         |
| 208601_s_at | TUBB1     | -0.027       | 0.0226   | -1.1993 | 0.2304       |
| 203819_s_at | IGF2BP3   | 0.2558       | 0.2172   | 1.178   | 0.2388       |
| 214146_s_at | PPBP      | 0.3709       | 0.318    | 1.1662  | 0.2435       |
| 225166_at   | ARHGAP18  | -0.1044      | 0.0931   | -1.1215 | 0.2621       |
| 211026_s_at | MGLL      | 0.0985       | 0.0888   | 1.1095  | 0.2672       |
| 227451_s_at | C6ORF79   | 0.0931       | 0.0848   | 1.0982  | 0.2721       |
| 207156_at   | HIST1H2AG | 0.0987       | 0.0978   | 1.0095  | 0.3127       |
| 37966_at    | PARVB     | 0.1051       | 0.1042   | 1.0088  | 0.3131       |
| 230645_at   | FRMD3     | -0.1245      | 0.1235   | -1.008  | 0.3135       |
| 226188_at   | LGALS1    | 0.0741       | 0.0741   | 1.0009  | 0.3169       |
| 201906_s_at | CTDSPL    | -0.0608      | 0.0611   | -0.9946 | 0.3199       |
| 207550_at   | MPL       | 0.0296       | 0.03     | 0.9879  | 0.3232       |
| 206167_s_at | ARHGAP6   | 0.161        | 0.1631   | 0.9868  | 0.3237       |
| 207815_at   | PF4V1     | -0.0301      | 0.0352   | -0.8557 | 0.3922       |
| 225354_s_at | SH3BGRL2  | 0.0631       | 0.0743   | 0.8504  | 0.3951       |
| 207206_s_at | ALOX12    | -0.021       | 0.0267   | -0.7848 | 0.4326       |
| 205442_at   | MFAP3L    | -0.0908      | 0.1444   | -0.6284 | 0.5297       |

## Meta DvA

| <b>probe set</b> | <b>GeneName</b> | <b>Effect.fixed</b> | <b>SE.fixed</b> | <b>Z.fixed</b> | <b>Pvalue.fixed</b> |
|------------------|-----------------|---------------------|-----------------|----------------|---------------------|
| 229778_at        | C12ORF39        | 0.0092              | 0.0211          | 0.4355         | 0.6632              |
| 210387_at        | HIST1H2BG       | 0.0548              | 0.1351          | 0.4057         | 0.685               |
| 212573_at        | ENDOD1          | 0.0307              | 0.0772          | 0.3976         | 0.691               |
| 230690_at        | TUBB1           | 0.0094              | 0.0247          | 0.3814         | 0.7029              |
| 206049_at        | SELP            | 0.0186              | 0.0552          | 0.3366         | 0.7364              |
| 206390_x_at      | PF4             | -0.0253             | 0.0859          | -0.2949        | 0.7681              |
| 230942_at        | CMTM5           | -0.0098             | 0.0353          | -0.2782        | 0.7809              |
| 206110_at        | HIST1H3H        | -0.0169             | 0.0881          | -0.1917        | 0.848               |
| 215779_s_at      | HIST1H2BG       | 0.0158              | 0.0895          | 0.1769         | 0.8596              |
| 201059_at        | CTTN            | -0.0064             | 0.0569          | -0.1131        | 0.9099              |
| 227088_at        | PDE5A           | 0.0124              | 0.1197          | 0.1033         | 0.9177              |
| 1555659_a_at     | TREML1          | -0.0031             | 0.0333          | -0.092         | 0.9267              |
| 227180_at        | ELOVL7          | -0.0115             | 0.1343          | -0.0853        | 0.932               |
| 1553842_at       | BEND2           | 0.0006              | 0.0294          | 0.0213         | 0.983               |

## Meta BvA

| probe set   | GeneName  | Effect.fixed | SE.fixed | Z.fixed | Pvalue.fixed |
|-------------|-----------|--------------|----------|---------|--------------|
| 201058_s_at | MYL9      | 0.6302       | 0.1457   | 4.3263  | 0            |
| 207414_s_at | PCSK6     | -0.3652      | 0.084    | -4.3468 | 0            |
| 227189_at   | CPNE5     | -0.2078      | 0.0485   | -4.2831 | 0            |
| 200665_s_at | SPARC     | 0.351        | 0.0956   | 3.6708  | 0.0002       |
| 226152_at   | TTC7B     | 0.2972       | 0.0853   | 3.4855  | 0.0005       |
| 212667_at   | SPARC     | 0.3599       | 0.1186   | 3.0356  | 0.0024       |
| 224823_at   | MYLK      | 0.3958       | 0.1306   | 3.0295  | 0.0024       |
| 203817_at   | GUCY1B3   | 0.2668       | 0.0896   | 2.978   | 0.0029       |
| 212077_at   | CALD1     | 0.2677       | 0.0917   | 2.9182  | 0.0035       |
| 209651_at   | TGFB111   | 0.2968       | 0.1068   | 2.7783  | 0.0055       |
| 204628_s_at | ITGB3     | 0.0907       | 0.0333   | 2.7233  | 0.0065       |
| 201108_s_at | THBS1     | 0.3143       | 0.1159   | 2.7125  | 0.0067       |
| 219090_at   | SLC24A3   | 0.2353       | 0.1001   | 2.3498  | 0.0188       |
| 212813_at   | JAM3      | 0.1787       | 0.0792   | 2.2569  | 0.024        |
| 206049_at   | SELP      | 0.1132       | 0.0513   | 2.2068  | 0.0273       |
| 37966_at    | PARVB     | 0.2096       | 0.0967   | 2.1668  | 0.0302       |
| 225974_at   | TMEM64    | 0.2798       | 0.1312   | 2.1336  | 0.0329       |
| 214974_x_at | CXCL5     | 0.615        | 0.3006   | 2.046   | 0.0408       |
| 57588_at    | SLC24A3   | 0.1824       | 0.0969   | 1.8823  | 0.0598       |
| 204115_at   | GNG11     | 0.1814       | 0.0979   | 1.8528  | 0.0639       |
| 207156_at   | HIST1H2AG | -0.1658      | 0.091    | -1.8227 | 0.0684       |
| 1560262_at  | LRRC32    | -0.047       | 0.026    | -1.8049 | 0.0711       |
| 225354_s_at | SH3BGRL2  | -0.123       | 0.069    | -1.7824 | 0.0747       |
| 203680_at   | PRKAR2B   | -0.2534      | 0.1448   | -1.75   | 0.0801       |
| 205442_at   | MFAP3L    | -0.2348      | 0.1342   | -1.7498 | 0.0802       |
| 208792_s_at | CLU       | 0.2209       | 0.1268   | 1.7417  | 0.0816       |
| 227180_at   | ELOVL7    | 0.2162       | 0.1248   | 1.7326  | 0.0832       |
| 206167_s_at | ARHGAP6   | 0.2616       | 0.1516   | 1.7261  | 0.0843       |
| 206494_s_at | ITGA2B    | -0.0336      | 0.0204   | -1.6513 | 0.0987       |
| 212651_at   | RHOBTB1   | 0.1514       | 0.0923   | 1.6397  | 0.1011       |
| 208782_at   | FSTL1     | 0.1443       | 0.0937   | 1.5391  | 0.1238       |
| 222717_at   | SDPR      | 0.1725       | 0.1131   | 1.5247  | 0.1273       |
| 208791_at   | CLU       | 0.1961       | 0.1333   | 1.4714  | 0.1412       |
| 1553842_at  | BEND2     | 0.0387       | 0.0273   | 1.4168  | 0.1565       |
| 207808_s_at | PROS1     | 0.1569       | 0.1147   | 1.3688  | 0.1711       |
| 214146_s_at | PPBP      | 0.384        | 0.2954   | 1.2999  | 0.1936       |
| 241133_at   | PRSS1     | -0.0327      | 0.0263   | -1.2419 | 0.2143       |
| 221556_at   | CDC14B    | -0.0888      | 0.073    | -1.2155 | 0.2242       |
| 226188_at   | LGALS1    | -0.0831      | 0.0688   | -1.2071 | 0.2274       |
| 210986_s_at | TPM1      | 0.0681       | 0.0592   | 1.1499  | 0.2502       |
| 216956_s_at | ITGA2B    | -0.0337      | 0.0293   | -1.1492 | 0.2505       |

## Meta BvA

| probe set    | GeneName  | Effect.fixed | SE.fixed | Z.fixed | Pvalue.fixed |
|--------------|-----------|--------------|----------|---------|--------------|
| 225166_at    | ARHGAP18  | -0.0892      | 0.0866   | -1.0305 | 0.3028       |
| 207815_at    | PF4V1     | 0.0331       | 0.0327   | 1.0111  | 0.312        |
| 230942_at    | CMTM5     | -0.0316      | 0.0329   | -0.9623 | 0.3359       |
| 207206_s_at  | ALOX12    | 0.0228       | 0.0249   | 0.9189  | 0.3581       |
| 203819_s_at  | IGF2BP3   | 0.1815       | 0.2017   | 0.8996  | 0.3683       |
| 1555659_a_at | TREML1    | -0.0252      | 0.031    | -0.8131 | 0.4162       |
| 235331_x_at  | PCGF5     | -0.0851      | 0.1049   | -0.8112 | 0.4173       |
| 228708_at    | RAB27B    | 0.1284       | 0.1587   | 0.8088  | 0.4186       |
| 210387_at    | HIST1H2BG | -0.1002      | 0.1255   | -0.7986 | 0.4245       |
| 230690_at    | TUBB1     | 0.018        | 0.023    | 0.7841  | 0.433        |
| 206110_at    | HIST1H3H  | -0.0615      | 0.082    | -0.7501 | 0.4532       |
| 206390_x_at  | PF4       | -0.0595      | 0.0799   | -0.7452 | 0.4561       |
| 215779_s_at  | HIST1H2BG | -0.0588      | 0.0832   | -0.7067 | 0.4797       |
| 1552773_at   | CLEC4D    | 0.0175       | 0.025    | 0.7013  | 0.4831       |
| 212151_at    | PBX1      | 0.051        | 0.0806   | 0.6325  | 0.5271       |
| 201906_s_at  | CTDSPL    | -0.0359      | 0.0568   | -0.6315 | 0.5277       |
| 220496_at    | CLEC1B    | 0.0083       | 0.0222   | 0.3713  | 0.7104       |
| 229778_at    | C12ORF39  | 0.006        | 0.0196   | 0.3087  | 0.7576       |
| 208601_s_at  | TUBB1     | -0.0063      | 0.021    | -0.2993 | 0.7647       |
| 203414_at    | MMD       | 0.0129       | 0.0597   | 0.2164  | 0.8287       |
| 206272_at    | RAB4A     | 0.0136       | 0.0665   | 0.2046  | 0.8379       |
| 212148_at    | PBX1      | 0.0171       | 0.1123   | 0.1522  | 0.879        |
| 212573_at    | ENDOD1    | 0.0085       | 0.0718   | 0.1188  | 0.9055       |
| 206493_at    | ITGA2B    | 0.0055       | 0.0474   | 0.1158  | 0.9078       |
| 211026_s_at  | MGLL      | -0.0052      | 0.0825   | -0.0628 | 0.9499       |
| 227451_s_at  | C6ORF79   | 0.004        | 0.0788   | 0.0514  | 0.959        |
| 230645_at    | FRMD3     | 0.0048       | 0.115    | 0.0415  | 0.9669       |
| 207550_at    | MPL       | 0.0008       | 0.0279   | 0.0301  | 0.976        |
| 206655_s_at  | GP1BB     | -0.0012      | 0.0489   | -0.0237 | 0.9811       |
| 201059_at    | CTTN      | -0.0011      | 0.0529   | -0.0206 | 0.9836       |
| 227088_at    | PDE5A     | 0.0013       | 0.1112   | 0.0121  | 0.9904       |

## Meta CVA

| probe set    | GeneName | Effect.fixed | SE.fixed | Z.fixed | Pvalue.fixed |
|--------------|----------|--------------|----------|---------|--------------|
| 200665_s_at  | SPARC    | 0.5088       | 0.0959   | 5.3072  | 0            |
| 201058_s_at  | MYL9     | 0.7394       | 0.1461   | 5.0619  | 0            |
| 201108_s_at  | THBS1    | 0.5727       | 0.1162   | 4.9274  | 0            |
| 204115_at    | GNG11    | 0.4012       | 0.0982   | 4.0847  | 0            |
| 207414_s_at  | PCSK6    | -0.3802      | 0.0843   | -4.5112 | 0            |
| 209651_at    | TGFB1I1  | 0.5039       | 0.1071   | 4.704   | 0            |
| 212077_at    | CALD1    | 0.4484       | 0.092    | 4.8743  | 0            |
| 212667_at    | SPARC    | 0.6249       | 0.1189   | 5.2549  | 0            |
| 226152_at    | TTC7B    | 0.4764       | 0.0855   | 5.5717  | 0            |
| 203817_at    | GUCY1B3  | 0.3611       | 0.0898   | 4.0194  | 0.0001       |
| 212813_at    | JAM3     | 0.3066       | 0.0794   | 3.8617  | 0.0001       |
| 224823_at    | MYLK     | 0.522        | 0.131    | 3.9849  | 0.0001       |
| 208782_at    | FSTL1    | 0.3534       | 0.094    | 3.7594  | 0.0002       |
| 219090_at    | SLC24A3  | 0.3441       | 0.1004   | 3.4258  | 0.0006       |
| 57588_at     | SLC24A3  | 0.3158       | 0.0972   | 3.2498  | 0.0012       |
| 1560262_at   | LRRC32   | -0.084       | 0.0261   | -3.2157 | 0.0013       |
| 214974_x_at  | CXCL5    | 0.9665       | 0.3016   | 3.2049  | 0.0014       |
| 227189_at    | CPNE5    | -0.1505      | 0.0487   | -3.092  | 0.002        |
| 225974_at    | TMEM64   | 0.3938       | 0.1316   | 2.9932  | 0.0028       |
| 207808_s_at  | PROS1    | 0.3417       | 0.115    | 2.9714  | 0.003        |
| 212651_at    | RHOBTB1  | 0.2616       | 0.0926   | 2.8255  | 0.0047       |
| 1555659_a_at | TREML1   | -0.08        | 0.0311   | -2.5735 | 0.0101       |
| 208792_s_at  | CLU      | 0.3252       | 0.1272   | 2.5574  | 0.0105       |
| 212573_at    | ENDOD1   | 0.1792       | 0.072    | 2.4891  | 0.0128       |
| 37966_at     | PARVB    | 0.2414       | 0.0971   | 2.4862  | 0.0129       |
| 1553842_at   | BEND2    | 0.0654       | 0.0274   | 2.3865  | 0.017        |
| 208791_at    | CLU      | 0.3113       | 0.1337   | 2.3287  | 0.0199       |
| 216956_s_at  | ITGA2B   | -0.0677      | 0.0294   | -2.3018 | 0.0213       |
| 206494_s_at  | ITGA2B   | -0.0457      | 0.0204   | -2.2389 | 0.0252       |
| 220496_at    | CLEC1B   | -0.0483      | 0.0223   | -2.1673 | 0.0302       |
| 203680_at    | PRKAR2B  | -0.3109      | 0.1452   | -2.1409 | 0.0323       |
| 203819_s_at  | IGF2BP3  | 0.4268       | 0.2024   | 2.1086  | 0.035        |
| 203414_at    | MMD      | 0.1232       | 0.0599   | 2.0567  | 0.0397       |
| 241133_at    | PRSS1    | -0.0526      | 0.0264   | -1.9919 | 0.0464       |
| 222717_at    | SDPR     | 0.2238       | 0.1134   | 1.9738  | 0.0484       |
| 207815_at    | PF4V1    | 0.0542       | 0.0328   | 1.6502  | 0.0989       |
| 214146_s_at  | PPBP     | 0.4741       | 0.2964   | 1.5994  | 0.1097       |
| 225166_at    | ARHGAP18 | -0.1329      | 0.0868   | -1.5302 | 0.126        |
| 206167_s_at  | ARHGAP6  | 0.2218       | 0.152    | 1.4585  | 0.1447       |
| 208601_s_at  | TUBB1    | -0.0301      | 0.0211   | -1.4294 | 0.1529       |
| 230942_at    | CMTM5    | -0.0461      | 0.0329   | -1.398  | 0.1621       |

## Meta CVA

| probe set   | GeneName  | Effect.fixed | SE.fixed | Z.fixed | Pvalue.fixed |
|-------------|-----------|--------------|----------|---------|--------------|
| 205442_at   | MFAP3L    | -0.1801      | 0.1346   | -1.3378 | 0.181        |
| 206272_at   | RAB4A     | 0.0838       | 0.0667   | 1.2556  | 0.2093       |
| 204628_s_at | ITGB3     | 0.0411       | 0.0334   | 1.2307  | 0.2184       |
| 230690_at   | TUBB1     | -0.0281      | 0.023    | -1.2192 | 0.2228       |
| 211026_s_at | MGLL      | 0.0928       | 0.0828   | 1.1213  | 0.2622       |
| 227180_at   | ELOVL7    | -0.1224      | 0.1252   | -0.9774 | 0.3284       |
| 212148_at   | PBX1      | 0.1085       | 0.1126   | 0.9629  | 0.3356       |
| 206493_at   | ITGA2B    | -0.0425      | 0.0475   | -0.8948 | 0.3709       |
| 201906_s_at | CTDSPL    | 0.0506       | 0.057    | 0.8878  | 0.3746       |
| 235331_x_at | PCGF5     | -0.085       | 0.1053   | -0.808  | 0.4191       |
| 225354_s_at | SH3BGRL2  | -0.0488      | 0.0692   | -0.7048 | 0.481        |
| 207206_s_at | ALOX12    | -0.0173      | 0.0249   | -0.6957 | 0.4866       |
| 212151_at   | PBX1      | 0.0561       | 0.0808   | 0.6941  | 0.4876       |
| 1552773_at  | CLEC4D    | -0.0171      | 0.0251   | -0.6813 | 0.4957       |
| 201059_at   | CTTN      | 0.0354       | 0.0531   | 0.6681  | 0.5041       |
| 206049_at   | SELP      | 0.0323       | 0.0515   | 0.6273  | 0.5305       |
| 206390_x_at | PF4       | -0.0487      | 0.0801   | -0.6077 | 0.5434       |
| 206110_at   | HIST1H3H  | -0.0484      | 0.0822   | -0.589  | 0.5558       |
| 210387_at   | HIST1H2BG | 0.0653       | 0.1259   | 0.5188  | 0.6039       |
| 229778_at   | C12ORF39  | -0.0071      | 0.0197   | -0.3622 | 0.7172       |
| 226188_at   | LGALS1    | -0.0192      | 0.069    | -0.2776 | 0.7813       |
| 227088_at   | PDE5A     | 0.0298       | 0.1116   | 0.2671  | 0.7894       |
| 207550_at   | MPL       | -0.0036      | 0.028    | -0.128  | 0.8981       |
| 215779_s_at | HIST1H2BG | -0.0098      | 0.0835   | -0.1177 | 0.9063       |
| 221556_at   | CDC14B    | 0.0053       | 0.0732   | 0.0728  | 0.9419       |
| 210986_s_at | TPM1      | -0.0034      | 0.0594   | -0.0567 | 0.9548       |
| 230645_at   | FRMD3     | 0.0063       | 0.1153   | 0.0548  | 0.9563       |
| 227451_s_at | C6ORF79   | 0.0032       | 0.079    | 0.0403  | 0.9679       |
| 207156_at   | HIST1H2AG | -0.0034      | 0.0912   | -0.0372 | 0.9703       |
| 228708_at   | RAB27B    | -0.0039      | 0.1592   | -0.0245 | 0.9805       |
| 206655_s_at | GP1BB     | 0.0004       | 0.049    | 0.0085  | 0.9932       |

## Meta DvA

| probe set   | GeneName | Effect.fixed | SE.fixed | Z.fixed | Pvalue.fixed |
|-------------|----------|--------------|----------|---------|--------------|
| 203680_at   | PRKAR2B  | -0.6499      | 0.1558   | -4.1718 | 0            |
| 212651_at   | RHOBTB1  | 0.4089       | 0.0993   | 4.1185  | 0            |
| 201058_s_at | MYL9     | 0.6082       | 0.1566   | 3.8835  | 0.0001       |
| 226152_at   | TTC7B    | 0.3655       | 0.0917   | 3.9878  | 0.0001       |
| 227189_at   | CPNE5    | -0.2094      | 0.0522   | -4.0127 | 0.0001       |
| 207414_s_at | PCSK6    | -0.3381      | 0.0904   | -3.7384 | 0.0002       |
| 212077_at   | CALD1    | 0.3534       | 0.0986   | 3.5831  | 0.0003       |
| 224823_at   | MYLK     | 0.5077       | 0.1404   | 3.616   | 0.0003       |
| 212667_at   | SPARC    | 0.4303       | 0.1275   | 3.3752  | 0.0007       |
| 209651_at   | TGFB11   | 0.3813       | 0.1148   | 3.3208  | 0.0009       |
| 212813_at   | JAM3     | 0.2827       | 0.0851   | 3.3205  | 0.0009       |
| 201108_s_at | THBS1    | 0.4083       | 0.1247   | 3.274   | 0.0011       |
| 200665_s_at | SPARC    | 0.3298       | 0.1027   | 3.21    | 0.0013       |
| 57588_at    | SLC24A3  | 0.3349       | 0.1042   | 3.2126  | 0.0013       |
| 219090_at   | SLC24A3  | 0.3437       | 0.1077   | 3.1918  | 0.0014       |
| 216956_s_at | ITGA2B   | -0.093       | 0.0315   | -2.9512 | 0.0032       |
| 203817_at   | GUCY1B3  | 0.2673       | 0.0963   | 2.7761  | 0.0055       |
| 222717_at   | SDPR     | 0.3063       | 0.1215   | 2.522   | 0.0117       |
| 206494_s_at | ITGA2B   | -0.0514      | 0.0219   | -2.3496 | 0.0188       |
| 212148_at   | PBX1     | 0.2828       | 0.1209   | 2.34    | 0.0193       |
| 1552773_at  | CLEC4D   | -0.0628      | 0.0268   | -2.3372 | 0.0194       |
| 208782_at   | FSTL1    | 0.2304       | 0.1008   | 2.2856  | 0.0223       |
| 207808_s_at | PROS1    | 0.2797       | 0.1234   | 2.2679  | 0.0233       |
| 1560262_at  | LRRC32   | -0.0631      | 0.028    | -2.2505 | 0.0244       |
| 204115_at   | GNG11    | 0.2326       | 0.1053   | 2.2091  | 0.0272       |
| 206272_at   | RAB4A    | 0.152        | 0.0716   | 2.1229  | 0.0338       |
| 214974_x_at | CXCL5    | 0.6752       | 0.3236   | 2.0867  | 0.0369       |
| 212151_at   | PBX1     | 0.1782       | 0.0867   | 2.0558  | 0.0398       |
| 206655_s_at | GP1BB    | -0.1053      | 0.0525   | -2.0031 | 0.0452       |
| 228708_at   | RAB27B   | -0.332       | 0.1709   | -1.9429 | 0.052        |
| 225974_at   | TMEM64   | 0.2412       | 0.1411   | 1.709   | 0.0874       |
| 203414_at   | MMD      | 0.1091       | 0.0643   | 1.698   | 0.0895       |
| 208791_at   | CLU      | 0.2405       | 0.1433   | 1.6789  | 0.0932       |
| 241133_at   | PRSS1    | -0.0474      | 0.0283   | -1.6765 | 0.0936       |
| 208792_s_at | CLU      | 0.2247       | 0.1363   | 1.6489  | 0.0992       |
| 220496_at   | CLEC1B   | -0.0371      | 0.0239   | -1.5526 | 0.1205       |
| 221556_at   | CDC14B   | 0.1201       | 0.0785   | 1.5291  | 0.1262       |
| 235331_x_at | PCGF5    | -0.1656      | 0.1129   | -1.4659 | 0.1427       |
| 210986_s_at | TPM1     | 0.0916       | 0.0637   | 1.4382  | 0.1504       |
| 204628_s_at | ITGB3    | 0.0479       | 0.0358   | 1.3395  | 0.1804       |
| 206493_at   | ITGA2B   | -0.0668      | 0.0509   | -1.3106 | 0.19         |

Meta DvA

| probe set    | GeneName  | Effect.fixed | SE.fixed | Z.fixed | Pvalue.fixed |
|--------------|-----------|--------------|----------|---------|--------------|
| 208601_s_at  | TUBB1     | -0.027       | 0.0226   | -1.1993 | 0.2304       |
| 203819_s_at  | IGF2BP3   | 0.2558       | 0.2172   | 1.178   | 0.2388       |
| 214146_s_at  | PPBP      | 0.3709       | 0.318    | 1.1662  | 0.2435       |
| 225166_at    | ARHGAP18  | -0.1044      | 0.0931   | -1.1215 | 0.2621       |
| 211026_s_at  | MGLL      | 0.0985       | 0.0888   | 1.1095  | 0.2672       |
| 227451_s_at  | C6ORF79   | 0.0931       | 0.0848   | 1.0982  | 0.2721       |
| 207156_at    | HIST1H2AG | 0.0987       | 0.0978   | 1.0095  | 0.3127       |
| 37966_at     | PARVB     | 0.1051       | 0.1042   | 1.0088  | 0.3131       |
| 230645_at    | FRMD3     | -0.1245      | 0.1235   | -1.008  | 0.3135       |
| 226188_at    | LGALS1    | 0.0741       | 0.0741   | 1.0009  | 0.3169       |
| 201906_s_at  | CTDSPL    | -0.0608      | 0.0611   | -0.9946 | 0.3199       |
| 207550_at    | MPL       | 0.0296       | 0.03     | 0.9879  | 0.3232       |
| 206167_s_at  | ARHGAP6   | 0.161        | 0.1631   | 0.9868  | 0.3237       |
| 207815_at    | PF4V1     | -0.0301      | 0.0352   | -0.8557 | 0.3922       |
| 225354_s_at  | SH3BGRL2  | 0.0631       | 0.0743   | 0.8504  | 0.3951       |
| 207206_s_at  | ALOX12    | -0.021       | 0.0267   | -0.7848 | 0.4326       |
| 205442_at    | MFAP3L    | -0.0908      | 0.1444   | -0.6284 | 0.5297       |
| 229778_at    | C12ORF39  | 0.0092       | 0.0211   | 0.4355  | 0.6632       |
| 210387_at    | HIST1H2BG | 0.0548       | 0.1351   | 0.4057  | 0.685        |
| 212573_at    | ENDOD1    | 0.0307       | 0.0772   | 0.3976  | 0.691        |
| 230690_at    | TUBB1     | 0.0094       | 0.0247   | 0.3814  | 0.7029       |
| 206049_at    | SELP      | 0.0186       | 0.0552   | 0.3366  | 0.7364       |
| 206390_x_at  | PF4       | -0.0253      | 0.0859   | -0.2949 | 0.7681       |
| 230942_at    | CMTM5     | -0.0098      | 0.0353   | -0.2782 | 0.7809       |
| 206110_at    | HIST1H3H  | -0.0169      | 0.0881   | -0.1917 | 0.848        |
| 215779_s_at  | HIST1H2BG | 0.0158       | 0.0895   | 0.1769  | 0.8596       |
| 201059_at    | CTTN      | -0.0064      | 0.0569   | -0.1131 | 0.9099       |
| 227088_at    | PDE5A     | 0.0124       | 0.1197   | 0.1033  | 0.9177       |
| 1555659_a_at | TREML1    | -0.0031      | 0.0333   | -0.092  | 0.9267       |
| 227180_at    | ELOVL7    | -0.0115      | 0.1343   | -0.0853 | 0.932        |
| 1553842_at   | BEND2     | 0.0006       | 0.0294   | 0.0213  | 0.983        |



## Smith Survival

| probe set    | GeneName  | p-value | coef    | se(coef) |
|--------------|-----------|---------|---------|----------|
| 200665_s_at  | SPARC     | 0.0007  | 1.16    | 0.3656   |
| 226152_at    | TTC7B     | 0.0068  | 1.0027  | 0.3797   |
| 201059_at    | CTTN      | 0.0075  | 1.77    | 0.708    |
| 212667_at    | SPARC     | 0.01    | 0.6115  | 0.2392   |
| 206494_s_at  | ITGA2B    | 0.0124  | -4.2229 | 1.7721   |
| 209651_at    | TGFB111   | 0.015   | 0.6664  | 0.2838   |
| 207808_s_at  | PROS1     | 0.0158  | 0.6132  | 0.2557   |
| 206167_s_at  | ARHGAP6   | 0.0232  | 0.3732  | 0.1564   |
| 212077_at    | CALD1     | 0.025   | 0.7635  | 0.3588   |
| 225974_at    | TMEM64    | 0.0353  | 0.4378  | 0.2198   |
| 212573_at    | ENDOD1    | 0.0404  | 0.8399  | 0.4159   |
| 241133_at    | PRSS1     | 0.0502  | -2.4021 | 1.2565   |
| 208782_at    | FSTL1     | 0.0517  | 0.5833  | 0.2949   |
| 207414_s_at  | PCSK6     | 0.062   | -0.5893 | 0.311    |
| 201108_s_at  | THBS1     | 0.0669  | 0.3965  | 0.2163   |
| 212813_at    | JAM3      | 0.0776  | 0.5943  | 0.325    |
| 201058_s_at  | MYL9      | 0.1035  | 0.3212  | 0.1993   |
| 228708_at    | RAB27B    | 0.1179  | 0.2355  | 0.1473   |
| 210986_s_at  | TPM1      | 0.125   | 0.7216  | 0.4965   |
| 216956_s_at  | ITGA2B    | 0.135   | -1.6176 | 1.1078   |
| 201906_s_at  | CTDSPL    | 0.1811  | -0.6141 | 0.4608   |
| 1555659_a_at | TREML1    | 0.1919  | -1.1708 | 0.9216   |
| 230942_at    | CMTM5     | 0.1939  | -1.1224 | 0.875    |
| 206390_x_at  | PF4       | 0.2164  | -0.4466 | 0.3727   |
| 221556_at    | CDC14B    | 0.2219  | 0.4561  | 0.3736   |
| 204115_at    | GNG11     | 0.2335  | 0.3405  | 0.2805   |
| 207156_at    | HIST1H2AG | 0.2611  | -0.3583 | 0.3344   |
| 206110_at    | HIST1H3H  | 0.2786  | -0.3734 | 0.3557   |
| 222717_at    | SDPR      | 0.2947  | -0.403  | 0.3962   |

## Smith Survival

| probe set   | GeneName  | p-value | coef    | se(coef) |
|-------------|-----------|---------|---------|----------|
| 226188_at   | LGALS1    | 0.2975  | -0.3809 | 0.3643   |
| 1553842_at  | BEND2     | 0.324   | -0.8626 | 0.8985   |
| 207815_at   | PF4V1     | 0.3257  | -0.8234 | 0.925    |
| 206272_at   | RAB4A     | 0.3294  | -0.3819 | 0.393    |
| 203680_at   | PRKAR2B   | 0.3633  | -0.1792 | 0.1967   |
| 207206_s_at | ALOX12    | 0.4231  | -1.0305 | 1.3097   |
| 203819_s_at | IGF2BP3   | 0.4346  | 0.0962  | 0.121    |
| 214146_s_at | PPBP      | 0.4367  | 0.0595  | 0.0743   |
| 37966_at    | PARVB     | 0.4385  | 0.1988  | 0.259    |
| 206493_at   | ITGA2B    | 0.4508  | -0.4913 | 0.6512   |
| 210387_at   | HIST1H2BG | 0.4719  | 0.1475  | 0.2022   |
| 229778_at   | C12ORF39  | 0.4795  | 0.671   | 0.8788   |
| 204628_s_at | ITGB3     | 0.4917  | 0.5964  | 0.8558   |
| 208601_s_at | TUBB1     | 0.5099  | -1.0219 | 1.5701   |
| 214974_x_at | CXCL5     | 0.5212  | 0.0544  | 0.0843   |
| 207550_at   | MPL       | 0.5222  | 0.6329  | 0.978    |
| 219090_at   | SLC24A3   | 0.5349  | 0.178   | 0.2873   |
| 227189_at   | CPNE5     | 0.5686  | 0.3442  | 0.5912   |
| 220496_at   | CLEC1B    | 0.5744  | -0.7464 | 1.3398   |
| 225354_s_at | SH3BGRL2  | 0.583   | 0.1957  | 0.3607   |
| 1552773_at  | CLEC4D    | 0.5937  | -0.6349 | 1.1939   |
| 230690_at   | TUBB1     | 0.6484  | 0.628   | 1.3766   |
| 1560262_at  | LRRC32    | 0.6493  | -0.4511 | 0.9989   |
| 212651_at   | RHOBTB1   | 0.6608  | -0.1288 | 0.2925   |
| 212151_at   | PBX1      | 0.673   | -0.1516 | 0.3599   |
| 203414_at   | MMD       | 0.677   | 0.185   | 0.4474   |
| 57588_at    | SLC24A3   | 0.6775  | 0.1189  | 0.2862   |
| 211026_s_at | MGLL      | 0.7065  | -0.1168 | 0.3082   |
| 227180_at   | ELOVL7    | 0.7329  | 0.0668  | 0.1962   |

## Smith Survival

| <b>probe set</b> | <b>GeneName</b> | <b>p-value</b> | <b>coef</b> | <b>se(coef)</b> |
|------------------|-----------------|----------------|-------------|-----------------|
| 215779_s_at      | HIST1H2BG       | 0.7456         | 0.112       | 0.3413          |
| 212148_at        | PBX1            | 0.7633         | -0.0689     | 0.2277          |
| 224823_at        | MYLK            | 0.7851         | 0.0609      | 0.2239          |
| 205442_at        | MFAP3L          | 0.8084         | 0.0464      | 0.1905          |
| 227451_s_at      | C6ORF79         | 0.8179         | 0.0711      | 0.3084          |
| 206049_at        | SELP            | 0.8328         | -0.1165     | 0.552           |
| 225166_at        | ARHGAP18        | 0.8335         | 0.0678      | 0.3233          |
| 227088_at        | PDE5A           | 0.8734         | -0.0406     | 0.2545          |
| 203817_at        | GUCY1B3         | 0.9191         | -0.0357     | 0.3508          |
| 208791_at        | CLU             | 0.9398         | 0.0199      | 0.2633          |
| 230645_at        | FRMD3           | 0.9476         | 0.0165      | 0.2509          |
| 208792_s_at      | CLU             | 0.958          | -0.0155     | 0.2937          |
| 235331_x_at      | PCGF5           | 0.9848         | 0.0039      | 0.2065          |
| 206655_s_at      | GP1BB           | 0.999          | -0.0008     | 0.6498          |

Meta Survival

| probe set    | GeneName | Effect.fixed | SE.fixed | Z.fixed | Pvalue.fixed |
|--------------|----------|--------------|----------|---------|--------------|
| 200665_s_at  | SPARC    | 0.7364       | 0.1931   | 3.8134  | 0.0001       |
| 212077_at    | CALD1    | 0.7018       | 0.2081   | 3.3726  | 0.0007       |
| 212667_at    | SPARC    | 0.4668       | 0.141    | 3.3097  | 0.0009       |
| 226152_at    | TTC7B    | 0.6533       | 0.2014   | 3.2433  | 0.0012       |
| 209651_at    | TGFB1I1  | 0.4801       | 0.1561   | 3.0765  | 0.0021       |
| 212573_at    | ENDOD1   | 0.6567       | 0.2234   | 2.9399  | 0.0033       |
| 208782_at    | FSTL1    | 0.516        | 0.1766   | 2.9224  | 0.0035       |
| 206167_s_at  | ARHGAP6  | 0.2821       | 0.0998   | 2.8268  | 0.0047       |
| 201059_at    | CTTN     | 1.0095       | 0.3676   | 2.7465  | 0.006        |
| 206494_s_at  | ITGA2B   | -2.2302      | 0.8628   | -2.5847 | 0.0097       |
| 207414_s_at  | PCSK6    | -0.5022      | 0.1959   | -2.5635 | 0.0104       |
| 201058_s_at  | MYL9     | 0.2788       | 0.1092   | 2.5539  | 0.0107       |
| 228708_at    | RAB27B   | 0.2425       | 0.0962   | 2.521   | 0.0117       |
| 207808_s_at  | PROS1    | 0.386        | 0.1547   | 2.4958  | 0.0126       |
| 201108_s_at  | THBS1    | 0.3303       | 0.1337   | 2.4702  | 0.0135       |
| 212813_at    | JAM3     | 0.4729       | 0.1953   | 2.4208  | 0.0155       |
| 1555659_a_at | TREML1   | -1.3264      | 0.5507   | -2.4084 | 0.016        |
| 225974_at    | TMEM64   | 0.3188       | 0.1335   | 2.3877  | 0.017        |
| 207550_at    | MPL      | 1.1338       | 0.5744   | 1.974   | 0.0484       |
| 241133_at    | PRSS1    | -1.3065      | 0.6851   | -1.907  | 0.0565       |
| 204115_at    | GNG11    | 0.3039       | 0.1641   | 1.8526  | 0.0639       |
| 210986_s_at  | TPM1     | 0.4896       | 0.2826   | 1.7327  | 0.0831       |
| 216956_s_at  | ITGA2B   | -0.9809      | 0.605    | -1.6215 | 0.1049       |
| 206390_x_at  | PF4      | -0.3201      | 0.2155   | -1.4851 | 0.1375       |
| 207815_at    | PF4V1    | -0.8771      | 0.5949   | -1.4744 | 0.1404       |
| 203680_at    | PRKAR2B  | -0.172       | 0.1172   | -1.4678 | 0.1422       |
| 230942_at    | CMTM5    | -0.6783      | 0.5001   | -1.3563 | 0.175        |
| 226188_at    | LGALS1   | -0.304       | 0.2289   | -1.3285 | 0.184        |
| 206272_at    | RAB4A    | -0.3239      | 0.2447   | -1.3238 | 0.1856       |

Meta Survival

| probe set   | GeneName  | Effect.fixed | SE.fixed | Z.fixed | Pvalue.fixed |
|-------------|-----------|--------------|----------|---------|--------------|
| 224823_at   | MYLK      | 0.1472       | 0.1245   | 1.183   | 0.2368       |
| 221556_at   | CDC14B    | 0.2488       | 0.2148   | 1.1582  | 0.2468       |
| 212151_at   | PBX1      | -0.251       | 0.2174   | -1.155  | 0.2481       |
| 207156_at   | HIST1H2AG | -0.2145      | 0.1925   | -1.114  | 0.2653       |
| 1553842_at  | BEND2     | -0.6083      | 0.5646   | -1.0774 | 0.2813       |
| 1552773_at  | CLEC4D    | -0.712       | 0.6731   | -1.0577 | 0.2902       |
| 230690_at   | TUBB1     | 0.8528       | 0.8113   | 1.0511  | 0.2932       |
| 214146_s_at | PPBP      | 0.0504       | 0.049    | 1.028   | 0.304        |
| 206110_at   | HIST1H3H  | -0.196       | 0.197    | -0.9951 | 0.3197       |
| 206493_at   | ITGA2B    | -0.3381      | 0.3563   | -0.949  | 0.3426       |
| 229778_at   | C12ORF39  | 0.5116       | 0.5699   | 0.8977  | 0.3693       |
| 214974_x_at | CXCL5     | 0.0476       | 0.0533   | 0.8916  | 0.3726       |
| 1560262_at  | LRRC32    | -0.5451      | 0.6605   | -0.8253 | 0.4092       |
| 212148_at   | PBX1      | -0.1213      | 0.1472   | -0.8236 | 0.4101       |
| 203819_s_at | IGF2BP3   | 0.0623       | 0.0758   | 0.8217  | 0.4112       |
| 37966_at    | PARVB     | 0.1255       | 0.1677   | 0.7483  | 0.4543       |
| 203817_at   | GUCY1B3   | 0.1328       | 0.1922   | 0.691   | 0.4896       |
| 210387_at   | HIST1H2BG | 0.078        | 0.1188   | 0.6569  | 0.5112       |
| 208791_at   | CLU       | 0.0766       | 0.1305   | 0.5873  | 0.557        |
| 225354_s_at | SH3BGRL2  | 0.1346       | 0.2311   | 0.5823  | 0.5604       |
| 219090_at   | SLC24A3   | 0.0984       | 0.1698   | 0.5792  | 0.5624       |
| 222717_at   | SDPR      | -0.0931      | 0.1647   | -0.5656 | 0.5717       |
| 201906_s_at | CTDSPL    | -0.1523      | 0.2745   | -0.5549 | 0.5789       |
| 206049_at   | SELP      | -0.1659      | 0.3339   | -0.497  | 0.6192       |
| 204628_s_at | ITGB3     | 0.2112       | 0.4554   | 0.4638  | 0.6428       |
| 225166_at   | ARHGAP18  | 0.0889       | 0.2003   | 0.4437  | 0.6572       |
| 205442_at   | MFAP3L    | -0.0524      | 0.124    | -0.4227 | 0.6725       |
| 235331_x_at | PCGF5     | -0.0587      | 0.1406   | -0.4173 | 0.6764       |
| 215779_s_at | HIST1H2BG | 0.0741       | 0.1798   | 0.412   | 0.6803       |

Meta Survival

| <b>probe set</b> | <b>GeneName</b> | <b>Effect.fixed</b> | <b>SE.fixed</b> | <b>Z.fixed</b> | <b>Pvalue.fixed</b> |
|------------------|-----------------|---------------------|-----------------|----------------|---------------------|
| 227088_at        | PDE5A           | -0.0586             | 0.1532          | -0.3826        | 0.702               |
| 220496_at        | CLEC1B          | 0.2904              | 0.775           | 0.3747         | 0.7079              |
| 212651_at        | RHOBTB1         | -0.0618             | 0.1722          | -0.3589        | 0.7197              |
| 57588_at         | SLC24A3         | 0.0595              | 0.173           | 0.3439         | 0.7309              |
| 211026_s_at      | MGLL            | -0.0582             | 0.1828          | -0.3183        | 0.7502              |
| 208601_s_at      | TUBB1           | -0.2562             | 0.8365          | -0.3063        | 0.7594              |
| 227189_at        | CPNE5           | 0.0779              | 0.3372          | 0.2311         | 0.8173              |
| 227180_at        | ELOVL7          | 0.0257              | 0.127           | 0.2026         | 0.8394              |
| 208792_s_at      | CLU             | 0.0219              | 0.1363          | 0.1605         | 0.8725              |
| 227451_s_at      | C6ORF79         | -0.0188             | 0.1968          | -0.0955        | 0.9239              |
| 230645_at        | FRMD3           | -0.0117             | 0.1308          | -0.0897        | 0.9285              |
| 206655_s_at      | GP1BB           | 0.0153              | 0.3192          | 0.048          | 0.9617              |
| 203414_at        | MMD             | 0.0125              | 0.2727          | 0.0458         | 0.9634              |
| 207206_s_at      | ALOX12          | 0.0106              | 0.5903          | 0.018          | 0.9857              |

Jorissen Survival

| probe set    | GeneName | Pvalue | coef    | se(coef) |
|--------------|----------|--------|---------|----------|
| 212077_at    | CALD1    | 0.0066 | 0.6705  | 0.2554   |
| 200665_s_at  | SPARC    | 0.0084 | 0.5725  | 0.2274   |
| 212667_at    | SPARC    | 0.0233 | 0.3896  | 0.1746   |
| 208782_at    | FSTL1    | 0.0296 | 0.4784  | 0.2204   |
| 209651_at    | TGFB1I1  | 0.0302 | 0.3993  | 0.1868   |
| 226152_at    | TTC7B    | 0.0302 | 0.5165  | 0.2376   |
| 212573_at    | ENDOD1   | 0.0304 | 0.5824  | 0.2648   |
| 1555659_a_at | TREML1   | 0.0345 | -1.4128 | 0.6869   |
| 201058_s_at  | MYL9     | 0.0476 | 0.2607  | 0.1305   |
| 207550_at    | MPL      | 0.0516 | 1.3975  | 0.7096   |
| 228708_at    | RAB27B   | 0.0539 | 0.2477  | 0.127    |
| 207414_s_at  | PCSK6    | 0.0793 | -0.4449 | 0.2523   |
| 201059_at    | CTTN     | 0.0846 | 0.7288  | 0.4301   |
| 201108_s_at  | THBS1    | 0.0902 | 0.2893  | 0.1701   |
| 206494_s_at  | ITGA2B   | 0.0925 | -1.611  | 0.9879   |
| 206167_s_at  | ARHGAP6  | 0.101  | 0.2195  | 0.1296   |
| 212813_at    | JAM3     | 0.1075 | 0.4042  | 0.2444   |
| 225974_at    | TMEM64   | 0.1251 | 0.2493  | 0.1681   |
| 204115_at    | GNG11    | 0.1669 | 0.285   | 0.2023   |
| 207808_s_at  | PROS1    | 0.1871 | 0.2549  | 0.1942   |
| 207815_at    | PF4V1    | 0.1947 | -0.915  | 0.7769   |
| 224823_at    | MYLK     | 0.2161 | 0.1859  | 0.1497   |
| 203680_at    | PRKAR2B  | 0.2459 | -0.1681 | 0.1459   |
| 212151_at    | PBX1     | 0.257  | -0.3082 | 0.2727   |
| 210986_s_at  | TPM1     | 0.2625 | 0.3785  | 0.3436   |
| 241133_at    | PRSS1    | 0.2909 | -0.843  | 0.8173   |
| 206390_x_at  | PF4      | 0.3192 | -0.2565 | 0.2642   |
| 216956_s_at  | ITGA2B   | 0.3222 | -0.7104 | 0.7221   |
| 230690_at    | TUBB1    | 0.342  | 0.9725  | 1.0043   |
| 1552773_at   | CLEC4D   | 0.3508 | -0.7479 | 0.8151   |
| 206272_at    | RAB4A    | 0.3584 | -0.2872 | 0.3127   |
| 203817_at    | GUCY1B3  | 0.3698 | 0.2051  | 0.2298   |
| 226188_at    | LGALS1   | 0.3901 | -0.254  | 0.2942   |
| 220496_at    | CLEC1B   | 0.3923 | 0.8118  | 0.9501   |
| 212148_at    | PBX1     | 0.4161 | -0.1589 | 0.193    |
| 205442_at    | MFAP3L   | 0.439  | -0.1251 | 0.1634   |
| 230942_at    | CMTM5    | 0.4431 | -0.4628 | 0.6094   |
| 1560262_at   | LRR32    | 0.478  | -0.6182 | 0.8804   |
| 214146_s_at  | PPBP     | 0.5167 | 0.0434  | 0.0653   |
| 206493_at    | ITGA2B   | 0.5229 | -0.2727 | 0.4257   |
| 208791_at    | CLU      | 0.5314 | 0.0951  | 0.1502   |

Jorissen Survival

| <b>probe set</b> | <b>GeneName</b> | <b>Pvalue</b> | <b>coef</b> | <b>se(coef)</b> |
|------------------|-----------------|---------------|-------------|-----------------|
| 214974_x_at      | CXCL5           | 0.5338        | 0.043       | 0.0689          |
| 207156_at        | HIST1H2AG       | 0.5364        | -0.1431     | 0.2355          |
| 1553842_at       | BEND2           | 0.5367        | -0.4423     | 0.7259          |
| 235331_x_at      | PCGF5           | 0.5579        | -0.1128     | 0.192           |
| 221556_at        | CDC14B          | 0.577         | 0.1465      | 0.2625          |
| 229778_at        | C12ORF39        | 0.6112        | 0.3959      | 0.7486          |
| 206110_at        | HIST1H3H        | 0.6132        | -0.1176     | 0.2366          |
| 206049_at        | SELP            | 0.6409        | -0.1945     | 0.4193          |
| 203819_s_at      | IGF2BP3         | 0.6816        | 0.0404      | 0.0973          |
| 207206_s_at      | ALOX12          | 0.6823        | 0.2761      | 0.6613          |
| 225166_at        | ARHGAP18        | 0.6885        | 0.102       | 0.2552          |
| 227088_at        | PDE5A           | 0.7191        | -0.0688     | 0.1919          |
| 37966_at         | PARVB           | 0.7416        | 0.0725      | 0.2201          |
| 227451_s_at      | C6ORF79         | 0.7525        | -0.0806     | 0.2557          |
| 225354_s_at      | SH3BGRL2        | 0.7589        | 0.092       | 0.3011          |
| 201906_s_at      | CTDSPL          | 0.7655        | 0.1017      | 0.3418          |
| 210387_at        | HIST1H2BG       | 0.779         | 0.0414      | 0.1467          |
| 215779_s_at      | HIST1H2BG       | 0.7802        | 0.0595      | 0.2115          |
| 219090_at        | SLC24A3         | 0.7915        | 0.0556      | 0.2106          |
| 203414_at        | MMD             | 0.7946        | -0.0895     | 0.344           |
| 208792_s_at      | CLU             | 0.8355        | 0.0321      | 0.1538          |
| 222717_at        | SDPR            | 0.8743        | -0.0284     | 0.1811          |
| 230645_at        | FRMD3           | 0.884         | -0.0223     | 0.1533          |
| 227189_at        | CPNE5           | 0.9019        | -0.0505     | 0.4105          |
| 212651_at        | RHOBTB1         | 0.902         | -0.0263     | 0.213           |
| 57588_at         | SLC24A3         | 0.9072        | 0.0253      | 0.2173          |
| 211026_s_at      | MGLL            | 0.9075        | -0.0264     | 0.227           |
| 204628_s_at      | ITGB3           | 0.9127        | 0.0591      | 0.5379          |
| 206655_s_at      | GP1BB           | 0.9554        | 0.0205      | 0.3664          |
| 208601_s_at      | TUBB1           | 0.9619        | 0.0473      | 0.9885          |
| 227180_at        | ELOVL7          | 0.9815        | -0.0039     | 0.1665          |



Meta Survival

| probe set    | GeneName  | Effect.fixed | SE.fixed | Z.fixed | Pvalue.fixed |
|--------------|-----------|--------------|----------|---------|--------------|
| 200665_s_at  | SPARC     | 0.7364       | 0.1931   | 3.8134  | 0.0001       |
| 212077_at    | CALD1     | 0.7018       | 0.2081   | 3.3726  | 0.0007       |
| 212667_at    | SPARC     | 0.4668       | 0.141    | 3.3097  | 0.0009       |
| 226152_at    | TTC7B     | 0.6533       | 0.2014   | 3.2433  | 0.0012       |
| 209651_at    | TGFB1I1   | 0.4801       | 0.1561   | 3.0765  | 0.0021       |
| 212573_at    | ENDOD1    | 0.6567       | 0.2234   | 2.9399  | 0.0033       |
| 208782_at    | FSTL1     | 0.516        | 0.1766   | 2.9224  | 0.0035       |
| 206167_s_at  | ARHGAP6   | 0.2821       | 0.0998   | 2.8268  | 0.0047       |
| 201059_at    | CTTN      | 1.0095       | 0.3676   | 2.7465  | 0.006        |
| 206494_s_at  | ITGA2B    | -2.2302      | 0.8628   | -2.5847 | 0.0097       |
| 207414_s_at  | PCSK6     | -0.5022      | 0.1959   | -2.5635 | 0.0104       |
| 201058_s_at  | MYL9      | 0.2788       | 0.1092   | 2.5539  | 0.0107       |
| 228708_at    | RAB27B    | 0.2425       | 0.0962   | 2.521   | 0.0117       |
| 207808_s_at  | PROS1     | 0.386        | 0.1547   | 2.4958  | 0.0126       |
| 201108_s_at  | THBS1     | 0.3303       | 0.1337   | 2.4702  | 0.0135       |
| 212813_at    | JAM3      | 0.4729       | 0.1953   | 2.4208  | 0.0155       |
| 1555659_a_at | TREML1    | -1.3264      | 0.5507   | -2.4084 | 0.016        |
| 225974_at    | TMEM64    | 0.3188       | 0.1335   | 2.3877  | 0.017        |
| 207550_at    | MPL       | 1.1338       | 0.5744   | 1.974   | 0.0484       |
| 241133_at    | PRSS1     | -1.3065      | 0.6851   | -1.907  | 0.0565       |
| 204115_at    | GNG11     | 0.3039       | 0.1641   | 1.8526  | 0.0639       |
| 210986_s_at  | TPM1      | 0.4896       | 0.2826   | 1.7327  | 0.0831       |
| 216956_s_at  | ITGA2B    | -0.9809      | 0.605    | -1.6215 | 0.1049       |
| 206390_x_at  | PF4       | -0.3201      | 0.2155   | -1.4851 | 0.1375       |
| 207815_at    | PF4V1     | -0.8771      | 0.5949   | -1.4744 | 0.1404       |
| 203680_at    | PRKAR2B   | -0.172       | 0.1172   | -1.4678 | 0.1422       |
| 230942_at    | CMTM5     | -0.6783      | 0.5001   | -1.3563 | 0.175        |
| 226188_at    | LGALS1    | -0.304       | 0.2289   | -1.3285 | 0.184        |
| 206272_at    | RAB4A     | -0.3239      | 0.2447   | -1.3238 | 0.1856       |
| 224823_at    | MYLK      | 0.1472       | 0.1245   | 1.183   | 0.2368       |
| 221556_at    | CDC14B    | 0.2488       | 0.2148   | 1.1582  | 0.2468       |
| 212151_at    | PBX1      | -0.251       | 0.2174   | -1.155  | 0.2481       |
| 207156_at    | HIST1H2AG | -0.2145      | 0.1925   | -1.114  | 0.2653       |
| 1553842_at   | BEND2     | -0.6083      | 0.5646   | -1.0774 | 0.2813       |
| 1552773_at   | CLEC4D    | -0.712       | 0.6731   | -1.0577 | 0.2902       |
| 230690_at    | TUBB1     | 0.8528       | 0.8113   | 1.0511  | 0.2932       |
| 214146_s_at  | PPBP      | 0.0504       | 0.049    | 1.028   | 0.304        |
| 206110_at    | HIST1H3H  | -0.196       | 0.197    | -0.9951 | 0.3197       |
| 206493_at    | ITGA2B    | -0.3381      | 0.3563   | -0.949  | 0.3426       |
| 229778_at    | C12ORF39  | 0.5116       | 0.5699   | 0.8977  | 0.3693       |
| 214974_x_at  | CXCL5     | 0.0476       | 0.0533   | 0.8916  | 0.3726       |

Meta Survival

| probe set   | GeneName  | Effect.fixed | SE.fixed | Z.fixed | Pvalue.fixed |
|-------------|-----------|--------------|----------|---------|--------------|
| 1560262_at  | LRRC32    | -0.5451      | 0.6605   | -0.8253 | 0.4092       |
| 212148_at   | PBX1      | -0.1213      | 0.1472   | -0.8236 | 0.4101       |
| 203819_s_at | IGF2BP3   | 0.0623       | 0.0758   | 0.8217  | 0.4112       |
| 37966_at    | PARVB     | 0.1255       | 0.1677   | 0.7483  | 0.4543       |
| 203817_at   | GUCY1B3   | 0.1328       | 0.1922   | 0.691   | 0.4896       |
| 210387_at   | HIST1H2BG | 0.078        | 0.1188   | 0.6569  | 0.5112       |
| 208791_at   | CLU       | 0.0766       | 0.1305   | 0.5873  | 0.557        |
| 225354_s_at | SH3BGRL2  | 0.1346       | 0.2311   | 0.5823  | 0.5604       |
| 219090_at   | SLC24A3   | 0.0984       | 0.1698   | 0.5792  | 0.5624       |
| 222717_at   | SDPR      | -0.0931      | 0.1647   | -0.5656 | 0.5717       |
| 201906_s_at | CTDSPL    | -0.1523      | 0.2745   | -0.5549 | 0.5789       |
| 206049_at   | SELP      | -0.1659      | 0.3339   | -0.497  | 0.6192       |
| 204628_s_at | ITGB3     | 0.2112       | 0.4554   | 0.4638  | 0.6428       |
| 225166_at   | ARHGAP18  | 0.0889       | 0.2003   | 0.4437  | 0.6572       |
| 205442_at   | MFAP3L    | -0.0524      | 0.124    | -0.4227 | 0.6725       |
| 235331_x_at | PCGF5     | -0.0587      | 0.1406   | -0.4173 | 0.6764       |
| 215779_s_at | HIST1H2BG | 0.0741       | 0.1798   | 0.412   | 0.6803       |
| 227088_at   | PDE5A     | -0.0586      | 0.1532   | -0.3826 | 0.702        |
| 220496_at   | CLEC1B    | 0.2904       | 0.775    | 0.3747  | 0.7079       |
| 212651_at   | RHOBTB1   | -0.0618      | 0.1722   | -0.3589 | 0.7197       |
| 57588_at    | SLC24A3   | 0.0595       | 0.173    | 0.3439  | 0.7309       |
| 211026_s_at | MGLL      | -0.0582      | 0.1828   | -0.3183 | 0.7502       |
| 208601_s_at | TUBB1     | -0.2562      | 0.8365   | -0.3063 | 0.7594       |
| 227189_at   | CPNE5     | 0.0779       | 0.3372   | 0.2311  | 0.8173       |
| 227180_at   | ELOVL7    | 0.0257       | 0.127    | 0.2026  | 0.8394       |
| 208792_s_at | CLU       | 0.0219       | 0.1363   | 0.1605  | 0.8725       |
| 227451_s_at | C6ORF79   | -0.0188      | 0.1968   | -0.0955 | 0.9239       |
| 230645_at   | FRMD3     | -0.0117      | 0.1308   | -0.0897 | 0.9285       |
| 206655_s_at | GP1BB     | 0.0153       | 0.3192   | 0.048   | 0.9617       |
| 203414_at   | MMD       | 0.0125       | 0.2727   | 0.0458  | 0.9634       |
| 207206_s_at | ALOX12    | 0.0106       | 0.5903   | 0.018   | 0.9857       |
